# Supplementary material for: Measurement and modelling solubility of amino acids and peptides in aqueous 2-propanol solutions
Source: Royal Society of Chemistry journal article supplement (doi:10.1039/d1cp00005e), 2021-01-01
Supplement: d1cp00005e1.pdf [file d1cp00005e1.pdf]

## ARTICLE

# Measurement and modelling solubility of amino acids and peptides in aqueous 2-propanol solutions

Hoang Tam Do<sup>a</sup>, Patrick Franke<sup>a</sup>, Sophia Volpert<sup>a</sup>, Marcel Klinksiak<sup>a</sup>, Max Thome<sup>a</sup>, Christoph Held<sup>a\*</sup>

Received 00th January  
20xx,  
Accepted 00th January  
20xx

DOI: 10.1039/x0xx00000x

## SUPPORTING INFORMATION

### Contents

|                                  |    |
|----------------------------------|----|
| 1. Substances.....               | 1  |
| 2. pKa values.....               | 2  |
| 3. pH-dependent solubility       | 3  |
| 4. Species distribution diagram  | 6  |
| 5. PC-SAFT parameters            | 13 |
| 6. Melting properties            | 14 |
| 7. Solubility data and pH values | 15 |
| 8. Diffractograms .              | 18 |
| 9. $g^E$ models vs. PC-SAFT      | 25 |
| 10. References ..                | 27 |

<sup>a</sup>Laboratory of Thermodynamics, TU Dortmund University, Emil-Figge-Str. 70, 44227 Dortmund, Germany. E-mail: christoph.held@tu-dortmund.de

\* Electronic supplementary information (ESI) available. See DOI:

\* E-mail: [christoph.held@tu-dortmund.de](mailto:christoph.held@tu-dortmund.de)

## 1. Substances

Table S1 Substances, abbreviations, suppliers, CAS numbers and mass-specific purities and molar mass (*M*) of the solutes used in this work.

| <i>Solute</i>                      | <i>Abbrev.</i>     | <i>Supplier</i>      | <i>CAS no.</i>    | <i>Purity / %</i> | <i>M / g·mol<sup>-1</sup></i> |
|------------------------------------|--------------------|----------------------|-------------------|-------------------|-------------------------------|
| <i>Glycine</i>                     | <i>Gly</i>         | <i>ROTH</i>          | <i>56-40-6</i>    | ≥ 99.0            | <i>75.070</i>                 |
| <i>L-alanine</i>                   | <i>Ala</i>         | <i>Sigma</i>         | <i>56-41-7</i>    | ≥ 98.0            | <i>89.100</i>                 |
| <i>L-valine</i>                    | <i>Val</i>         | <i>Alfa</i>          | <i>72-18-4</i>    | > 99.0            | <i>117.150</i>                |
| <i>L-leucine</i>                   | <i>Leu</i>         | <i>TCI</i>           | <i>61-90-5</i>    | > 99.0            | <i>131.180</i>                |
| <i>L-isoleucine</i>                | <i>Ile</i>         | <i>Sigma</i>         | <i>73-32-5</i>    | ≥ 99.5            | <i>131.180</i>                |
| <i>L-proline</i>                   | <i>Pro</i>         | <i>Bachem</i>        | <i>147-85-3</i>   | ≥ 99.0            | <i>115.140</i>                |
| <i>L-serine</i>                    | <i>Ser</i>         | <i>Bachem</i>        | <i>56-45-1</i>    | > 99.0            | <i>105.100</i>                |
| <i>L-threonine</i>                 | <i>Thr</i>         | <i>Sigma</i>         | <i>72-19-5</i>    | ≥ 98.0            | <i>119.120</i>                |
| <i>L-aspartic acid</i>             | <i>Asp</i>         | <i>Sigma</i>         | <i>56-84-8</i>    | ≥ 99.0            | <i>133.110</i>                |
| <i>L-asparagine</i>                | <i>Asn</i>         | <i>Sigma</i>         | <i>70-47-3</i>    | ≥ 98.0            | <i>132.120</i>                |
| <i>L-glutamic acid</i>             | <i>Glu</i>         | <i>Sigma</i>         | <i>56-86-0</i>    | ≥ 99.5            | <i>147.130</i>                |
| <i>L-glutamine</i>                 | <i>Gln</i>         | <i>Merck</i>         | <i>56-85-9</i>    | > 99.0            | <i>146.150</i>                |
| <i>L-arginine</i>                  | <i>Arg</i>         | <i>Merck</i>         | <i>74-79-3</i>    | ≥ 98.0            | <i>174.210</i>                |
| <i>L-histidine</i>                 | <i>His</i>         | <i>Sigma</i>         | <i>71-00-1</i>    | ≥ 99.0            | <i>155.160</i>                |
| <i>L-lysine</i>                    | <i>Lys</i>         | <i>Sigma</i>         | <i>56-87-1</i>    | ≥ 98.0            | <i>146.190</i>                |
| <i>L-phenylalanine</i>             | <i>Phe</i>         | <i>Merck</i>         | <i>63-91-2</i>    | ≥ 98.0            | <i>165.200</i>                |
| <i>L-tyrosine</i>                  | <i>Tyr</i>         | <i>Bachem</i>        | <i>60-18-4</i>    | ≥ 98.0            | <i>181.200</i>                |
| <i>L-tryptophan</i>                | <i>Trp</i>         | <i>Merck</i>         | <i>73-22-3</i>    | ≥ 98.0            | <i>204.230</i>                |
| <i>L-cysteine</i>                  | <i>Cys</i>         | <i>Merck</i>         | <i>52-90-4</i>    | ≥ 98.0            | <i>121.160</i>                |
| <i>L-methionine</i>                | <i>Met</i>         | <i>Merck</i>         | <i>63-68-3</i>    | ≥ 99.0            | <i>149.210</i>                |
| <i>Glycyl-glycine</i>              | <i>Gly-Gly</i>     | <i>Sigma</i>         | <i>556-50-3</i>   | ≥ 99.0            | <i>132.119</i>                |
| <i>Glycyl-L-alanine</i>            | <i>Gly-Ala</i>     | <i>Sigma</i>         | <i>3695-73-6</i>  | ≥ 99.0            | <i>146.146</i>                |
| <i>L-alanyl-glycine</i>            | <i>Ala-Gly</i>     | <i>Sigma</i>         | <i>687-69-4</i>   | ≥ 99.0            | <i>146.146</i>                |
| <i>L-alanyl-L-alanine</i>          | <i>Ala-Ala</i>     | <i>Sigma</i>         | <i>1948-31-8</i>  | ≥ 99.0            | <i>160.173</i>                |
| <i>Glycyl-L-serine</i>             | <i>Gly-Ser</i>     | <i>Bachem</i>        | <i>687-38-7</i>   | ≥ 99.0            | <i>162.145</i>                |
| <i>L-seryl-glycine</i>             | <i>Ser-Gly</i>     | <i>Bachem</i>        | <i>687-63-8</i>   | ≥ 99.0            | <i>162.145</i>                |
| <i>L-alanyl-L-serine</i>           | <i>Ala-Ser</i>     | <i>Bachem</i>        | <i>3303-41-1</i>  | ≥ 99.0            | <i>176.172</i>                |
| <i>L-seryl-L-alanine</i>           | <i>Ser-Ala</i>     | <i>Bachem</i>        | <i>6403-17-4</i>  | ≥ 99.0            | <i>176.172</i>                |
| <i>Glycyl-L-proline</i>            | <i>Gly-Pro</i>     | <i>Bachem</i>        | <i>704-15-4</i>   | ≥ 99.0            | <i>172.180</i>                |
| <i>L-prolyl-glycine</i>            | <i>Pro-Gly</i>     | <i>Bachem</i>        | <i>2578-57-6</i>  | ≥ 99.0            | <i>172.180</i>                |
| <i>L-alanyl-L-proline</i>          | <i>Ala-Pro</i>     | <i>Bachem</i>        | <i>13485-59-1</i> | ≥ 99.0            | <i>186.211</i>                |
| <i>L-prolyl-L-alanine</i>          | <i>Pro-Ala</i>     | <i>Bachem</i>        | <i>6422-36-2</i>  | ≥ 99.0            | <i>186.211</i>                |
| <i>Glycyl-glycyl-glycine</i>       | <i>Gly-Gly-Gly</i> | <i>Sigma</i>         | <i>556-33-2</i>   | ≥ 98.0            | <i>189.170</i>                |
| <i>Glycyl-glycyl-L-alanine</i>     | <i>Gly-Gly-Ala</i> | <i>Bachem</i>        | <i>19729-30-7</i> | ≥ 99.0            | <i>203.200</i>                |
| <i>Glycyl-L-alanyl-glycine</i>     | <i>Gly-Ala-Gly</i> | <i>Bachem</i>        | <i>16422-05-2</i> | ≥ 99.0            | <i>203.200</i>                |
| <i>L-alanyl-glycyl-L-alanine</i>   | <i>Ala-Gly-Ala</i> | <i>Bachem</i>        | <i>37460-22-3</i> | ≥ 99.0            | <i>217.225</i>                |
| <i>L-alanyl-L-alanyl-L-alanine</i> | <i>Ala-Ala-Ala</i> | <i>Bachem</i>        | <i>5874-90-8</i>  | ≥ 99.0            | <i>231.252</i>                |
| <i>L-Leucyl-glycyl-glycine</i>     | <i>Leu-Gly-Gly</i> | <i>Bachem</i>        | <i>1187-50-4</i>  | ≥ 99.0            | <i>245.279</i>                |
| <i>Glycyl-L-leucyl-glycine</i>     | <i>Gly-Leu-Gly</i> | <i>Bachem</i>        | <i>2576-67-2</i>  | ≥ 98.0            | <i>245.279</i>                |
| <i>Glycyl-glycyl-L-leucine</i>     | <i>Gly-Gly-Leu</i> | <i>Bachem</i>        | <i>14857-82-0</i> | ≥ 99.0            | <i>245.279</i>                |
| <i>Glycyl-L-alanyl-L-leucine</i>   | <i>Gly-Ala-Leu</i> | <i>Bachem</i>        | <i>22849-49-6</i> | ≥ 99.0            | <i>259.305</i>                |
| <i>2-propanol</i>                  | <i>2-prop.</i>     | <i>BDH Chemicals</i> | <i>67-63-0</i>    | ≥ 98.5            | <i>60.100</i>                 |

## 2. pKa values

Table S2 pK<sub>a</sub>-values of the amino acids measured in this work. All pK<sub>a</sub>-values in 10 wt%, 20 wt%, and 30 wt% of 2-propanol are taken from Dey et al.<sup>1</sup>. For the remaining components, the pK<sub>a</sub>-values were calculated by the software Chemicalize<sup>®</sup> and assumed to be solvent-independent. The error of this calculation is assumed not to be greater than 0.01.

| Component | pK <sub>a1</sub>    | pK <sub>a2</sub>     | pK <sub>a3</sub>    | pK <sub>a4</sub> |
|-----------|---------------------|----------------------|---------------------|------------------|
| Gly       | 10 wt%: 2.42 ± 0.07 | 10 wt%: 9.58 ± 0.05  | -                   |                  |
|           | 20 wt%: 2.61 ± 0.07 | 20 wt%: 9.61 ± 0.05  |                     |                  |
|           | 30 wt%: 2.79 ± 0.07 | 30 wt%: 9.65 ± 0.05  |                     |                  |
| Ala       | 10 wt%: 2.55 ± 0.06 | 10 wt%: 9.59 ± 0.05  | -                   |                  |
|           | 20 wt%: 2.75 ± 0.06 | 20 wt%: 9.61 ± 0.06  |                     |                  |
|           | 30 wt%: 2.95 ± 0.06 | 30 wt%: 9.63 ± 0.06  |                     |                  |
| Val       | 10 wt%: 2.47 ± 0.08 | 10 wt%: 9.69 ± 0.05  | -                   |                  |
|           | 20 wt%: 2.68 ± 0.08 | 20 wt%: 9.71 ± 0.05  |                     |                  |
|           | 30 wt%: 2.89 ± 0.09 | 30 wt%: 9.74 ± 0.05  |                     |                  |
| Leu       | 10 wt%: 2.55 ± 0.06 | 10 wt%: 9.52 ± 0.05  | -                   |                  |
|           | 20 wt%: 2.73 ± 0.06 | 20 wt%: 9.53 ± 0.05  |                     |                  |
|           | 30 wt%: 2.91 ± 0.07 | 30 wt%: 9.53 ± 0.06  |                     |                  |
| Ile       | 10 wt%: 2.55 ± 0.06 | 10 wt%: 9.52 ± 0.05  | -                   |                  |
|           | 20 wt%: 2.73 ± 0.06 | 20 wt%: 9.53 ± 0.05  |                     |                  |
|           | 30 wt%: 2.91 ± 0.07 | 30 wt%: 9.53 ± 0.06  |                     |                  |
| Pro       | 10 wt%: 2.11 ± 0.07 | 10 wt%: 10.62 ± 0.04 | -                   |                  |
|           | 20 wt%: 2.27 ± 0.07 | 20 wt%: 10.64 ± 0.04 |                     |                  |
|           | 30 wt%: 2.44 ± 0.07 | 30 wt%: 10.66 ± 0.04 |                     |                  |
| Ser       | 10 wt%: 2.35 ± 0.05 | 10 wt%: 8.97 ± 0.04  | 15.17               |                  |
|           | 20 wt%: 2.46 ± 0.05 | 20 wt%: 8.99 ± 0.04  |                     |                  |
|           | 30 wt%: 2.57 ± 0.05 | 30 wt%: 9.01 ± 0.04  |                     |                  |
| Thr       | 10 wt%: 2.32 ± 0.04 | 10 wt%: 9.00 ± 0.05  | 14.95               |                  |
|           | 20 wt%: 2.45 ± 0.04 | 20 wt%: 9.00 ± 0.05  |                     |                  |
|           | 30 wt%: 2.57 ± 0.05 | 30 wt%: 9.01 ± 0.05  |                     |                  |
| Asp       | 1.70                | 5.11                 | 9.61                |                  |
| Asn       | 10 wt%: 2.41 ± 0.06 | 10 wt%: 8.67 ± 0.05  | -                   |                  |
|           | 20 wt%: 2.59 ± 0.06 | 20 wt%: 8.70 ± 0.06  |                     |                  |
|           | 30 wt%: 2.78 ± 0.07 | 30 wt%: 8.73 ± 0.06  |                     |                  |
| Glu       | 1.88                | 4.27                 | 9.54                |                  |
| Gln       | 10 wt%: 2.36 ± 0.09 | 10 wt%: 9.07 ± 0.05  |                     |                  |
|           | 20 wt%: 2.55 ± 0.09 | 20 wt%: 9.10 ± 0.05  |                     |                  |
|           | 30 wt%: 2.75 ± 0.10 | 30 wt%: 9.13 ± 0.05  |                     |                  |
| Arg       | 2.41                | 9.12                 | 12.41               |                  |
| His       | 10 wt%: 1.83 ± 0.05 | 10 wt%: 5.79 ± 0.07  | 10 wt%: 9.11 ± 0.04 |                  |
|           | 20 wt%: 1.97 ± 0.05 | 20 wt%: 5.74 ± 0.08  | 20 wt%: 9.12 ± 0.04 |                  |
|           | 30 wt%: 2.10 ± 0.06 | 30 wt%: 6.68 ± 0.08  | 30 wt%: 9.12 ± 0.04 |                  |
| Lys       | 2.74                | 9.44                 | 10.29               |                  |
| Phe       | 10 wt%: 2.39 ± 0.04 | 10 wt%: 9.17 ± 0.07  | -                   |                  |
|           | 20 wt%: 2.52 ± 0.04 | 20 wt%: 9.20 ± 0.08  |                     |                  |
|           | 30 wt%: 2.64 ± 0.04 | 30 wt%: 9.23 ± 0.08  |                     |                  |
| Tyr       | 2.20                | 9.11                 | 10.13               |                  |
| Trp       | 2.43                | 9.44                 | -                   |                  |
| Cys       | 2.35                | 9.05                 | 10.17               |                  |
| Met       | 10 wt%: 2.40 ± 0.05 | 10 wt%: 9.18 ± 0.05  | -                   |                  |
|           | 20 wt%: 2.55 ± 0.05 | 20 wt%: 9.19 ± 0.05  |                     |                  |
|           | 30 wt%: 2.71 ± 0.05 | 30 wt%: 9.21 ± 0.05  |                     |                  |
| Gly-Gly   | 3.52                | 8.14                 | 15.32               | -                |
| Gly-Ala   | 3.61                | 8.14                 | 13.82               | -                |
| Ala-Gly   | 3.66                | 8.39                 | 14.32               | -                |
| Ala-Ala   | 3.73                | 8.39                 | 13.82               | -                |
| Gly-Ser   | 3.36                | 8.14                 | 12.66               | 15.11            |
| Ser-Gly   | 3.44                | 7.85                 | 13.92               | 15.15            |
| Ala-Ser   | 3.48                | 8.39                 | 12.72               | 15.11            |
| Ser-Ala   | 3.51                | 7.85                 | 13.50               | 15.13            |
| Gly-Pro   | 3.61                | 8.13                 | -                   | -                |

| Journal Name | ARTICLE |      |       |       |
|--------------|---------|------|-------|-------|
| Pro-Gly      | 3.66    | 9.81 | 14.29 | -     |
| Ala-Pro      | 3.71    | 8.38 | -     | -     |
| Pro-Ala      | 3.71    | 9.81 | 13.79 | -     |
| Gly-Gly-Gly  | 3.43    | 7.84 | 12.54 | 15.84 |
| Gly-Gly-Ala  | 3.49    | 7.84 | 12.60 | 14.43 |
| Gly-Ala-Gly  | 3.53    | 7.84 | 12.43 | 14.61 |
| Ala-Gly-Ala  | 3.58    | 8.09 | 12.64 | 14.39 |
| Ala-Ala-Ala  | 3.65    | 8.09 | 12.53 | 14.19 |
| Gly-Gly-Leu  | 3.72    | 7.82 | 12.82 | 14.16 |
| Gly-Leu-Gly  | 3.77    | 7.84 | 12.61 | 14.81 |
| Leu-Gly-Gly  | 3.39    | 8.13 | 12.82 | -     |
| Pro-Gly-Gly  | 3.26    | 9.50 | 12.60 | 15.94 |
| Gly-Ala-Leu  | 3.78    | 7.84 | 12.68 | 14.24 |

### 3. pH-dependent solubility

Table S3 Dissociations schemes together with the corresponding Henderson Hasselbalch equation and the components. The derivation principle was taken from A. Avdeef<sup>2</sup> and adapted to the way of dissociation of amino acids and peptides.

| Dissociation scheme                                                                                                 | Henderson Hasselbalch eq.                                                                                                             | Components                                                                                                                    |
|---------------------------------------------------------------------------------------------------------------------|---------------------------------------------------------------------------------------------------------------------------------------|-------------------------------------------------------------------------------------------------------------------------------|
| $H_3A^+ \rightleftharpoons H_2A^\pm \rightleftharpoons HA^- \rightleftharpoons A^{2-}$                              | $x_{HA,tot}^L = x_{HA}^L \cdot (1 + 10^{pK_{a1}-pH} + 10^{pH-pK_{a2}} + 10^{2pH-pK_{a3}-pK_{a2}})$                                    | Gly-Gly, Gly-Ala, Ala-Gly, Ala-Ala, Pro-Gly, Pro-Ala, Leu-Gly-Gly                                                             |
| $H_4A^+ \rightleftharpoons H_3A^\pm \rightleftharpoons H_2A^- \rightleftharpoons HA^{2-} \rightleftharpoons A^{3-}$ | $x_{HA,tot}^L = x_{HA}^L \cdot (1 + 10^{pK_{a1}-pH} + 10^{pH-pK_{a2}} + 10^{2pH-pK_{a3}-pK_{a2}} + 10^{3pH-pK_{a4}-pK_{a3}-pK_{a2}})$ | Gly-Ser, Ser-Gly, Ser-Ala, Ala-Ser, Gly-Gly-Gly, Gly-Gly-Ala, Gly-Ala-Gly, Ala-Gly-Ala, Ala-Ala-Ala, Gly-Gly-Leu, Gly-Leu-Gly |

The derivation of the Henderson Hasselbalch equation is shown below with the dissociation scheme, the charge of the species (S) and the dissociation constants for the tripeptide Gly-Gly-Gly

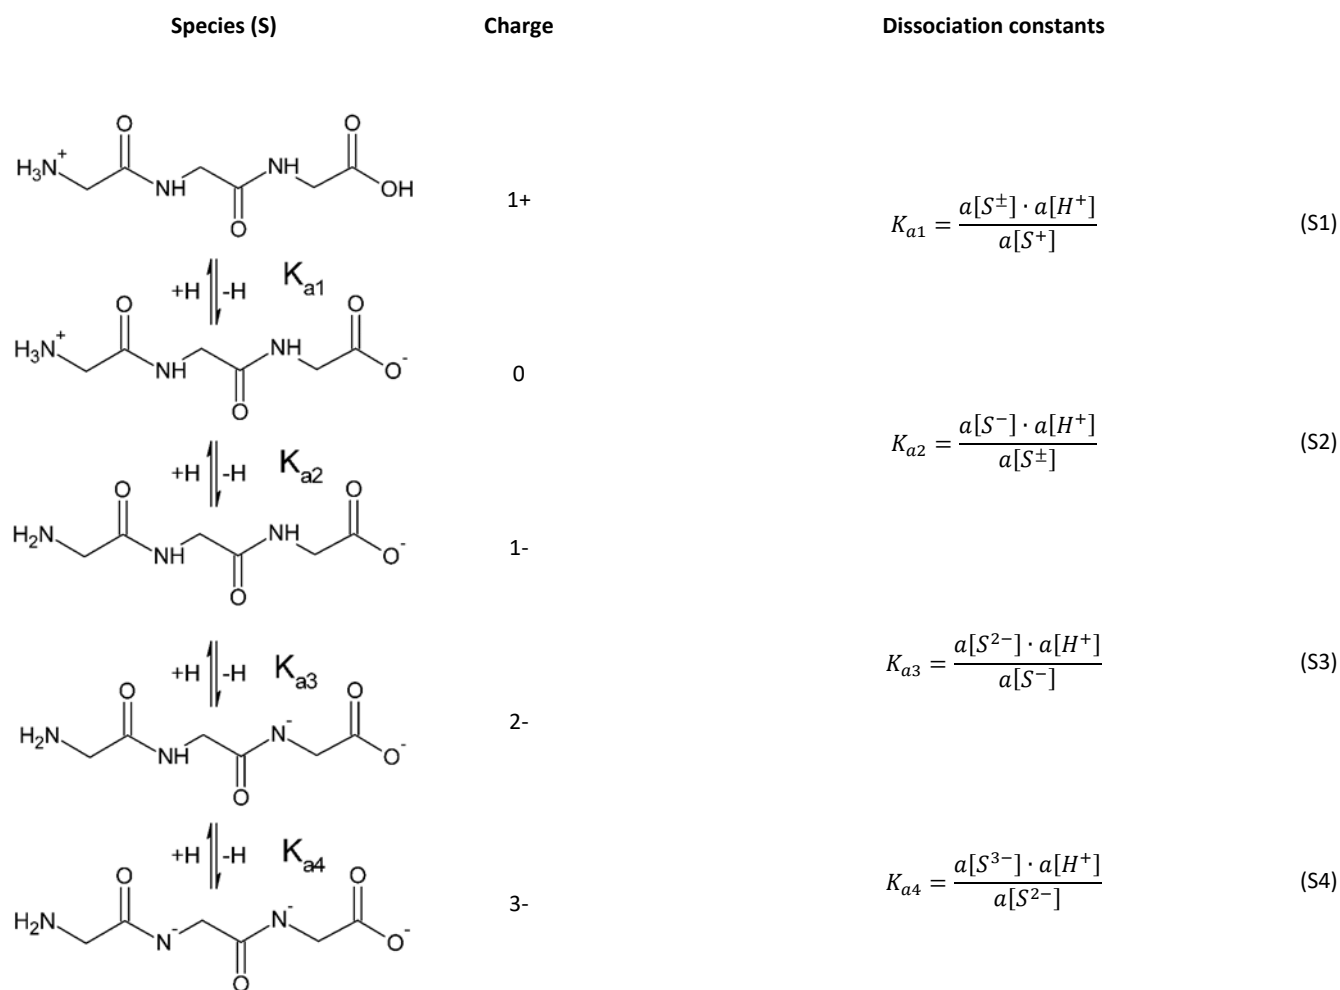

Where  $a[S^{charge}]$  represent the activity of the single charged species. The total activity  $a_{tot}$  is calculated based on the sum of the single activities shown in eq. S5

$$a_{tot} = a[S^{\pm}] + a[S^+] + a[S^-] + a[S^{2-}] + a[S^{3-}] \quad (S5)$$

Using the eqs. S1 - S5 the total activity can be rewritten based on the dissociation constants and the activity of the proton  $H^+$ .

$$a_{tot} = a[S^{\pm}] + a[S^{\pm}] \cdot \frac{a[H^+]}{K_{a1}} + a[S^{\pm}] \cdot \frac{K_{a2}}{a[H^+]} + a[S^{\pm}] \cdot \frac{K_{a2}}{a[H^+]} \cdot \frac{K_{a3}}{a[H^+]} + a[S^{\pm}] \cdot \frac{K_{a2}}{a[H^+]} \cdot \frac{K_{a3}}{a[H^+]} \cdot \frac{K_{a4}}{a[H^+]} \quad (S6)$$

With eqs. S7 and S8

$$a[H^+] = 10^{-pH} \quad (S7)$$

$$K_{ai} = 10^{-K_{ai}}; i = 1, 2, \dots, n - 1, n = \text{number of species} \quad (S8)$$

The equation can be simplified to

$$a_{tot} = a[S^{\pm}] \cdot (1 + 10^{pK_{a1} - pH} + 10^{pH - pK_{a2}} + 10^{2pH - pK_{a2} - pK_{a3}} + 10^{3pH - pK_{a2} - pK_{a3} - pK_{a4}}) \quad (S9)$$

---

Under the assumption that all activity coefficients of the charged species are equal, the solubility in mole fraction can be calculated using eq. S10

$$x_{\text{tot}}^L = x_{\pm}^L \cdot (1 + 10^{\text{p}K_{a1} - \text{pH}} + 10^{\text{pH} - \text{p}K_{a2}} + 10^{2\text{pH} - \text{p}K_{a3} - \text{p}K_{a2}} + 10^{3\text{pH} - \text{p}K_{a4} - \text{p}K_{a3} - \text{p}K_{a2}})$$
 (S10)

## 4. Species distribution diagram

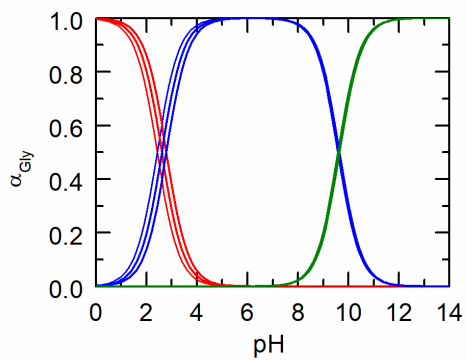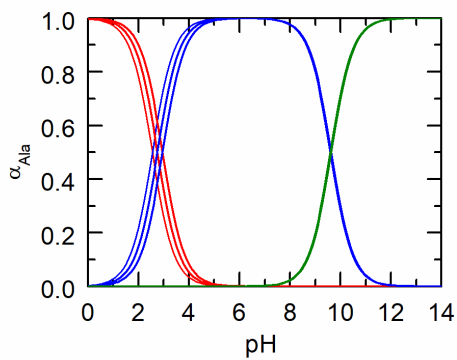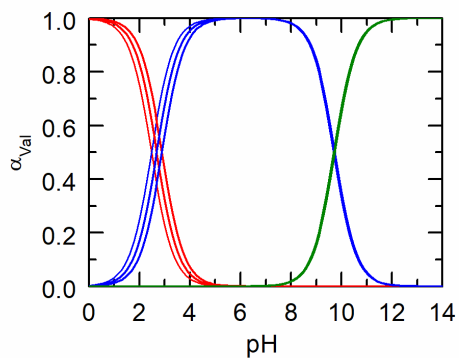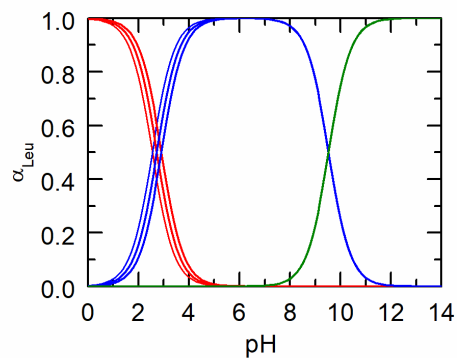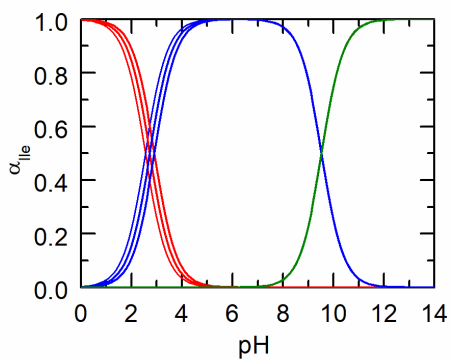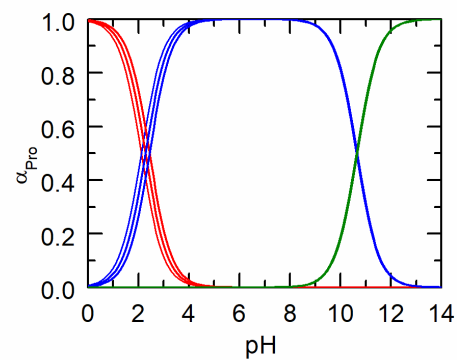

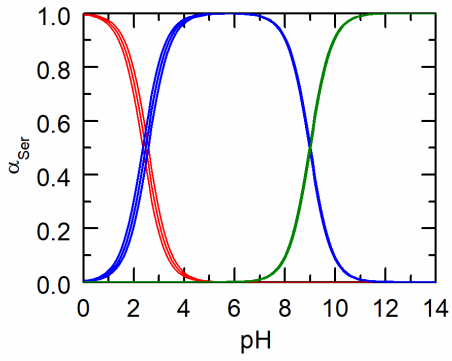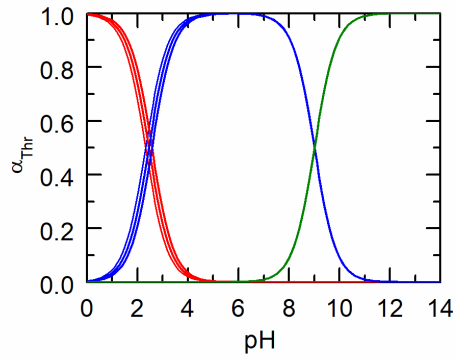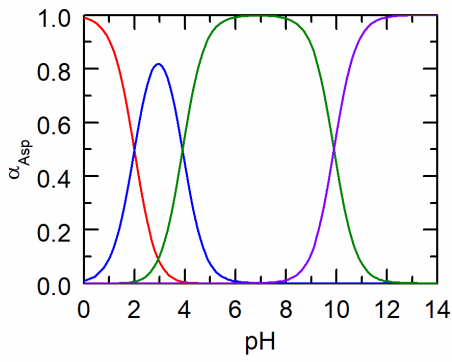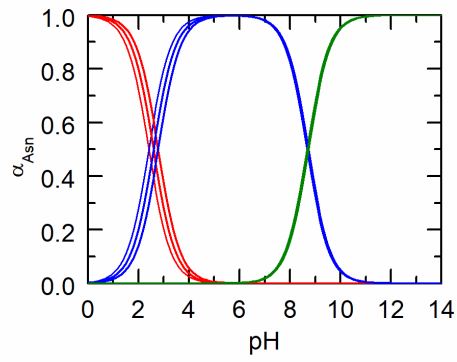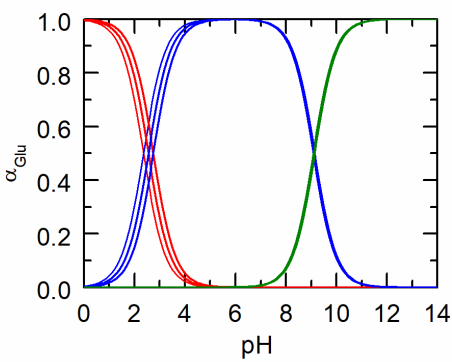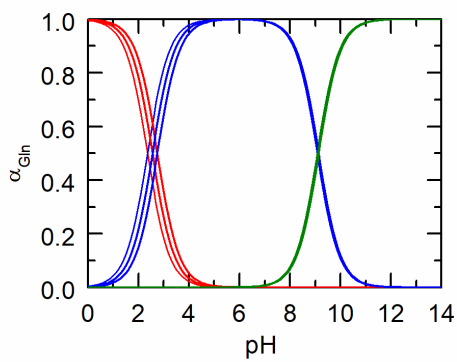



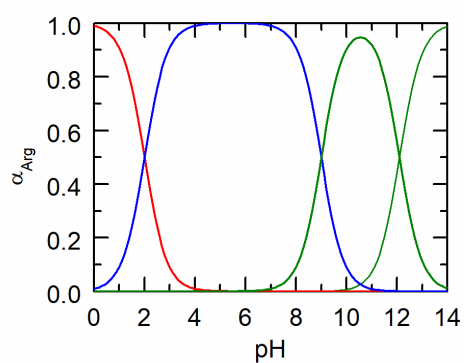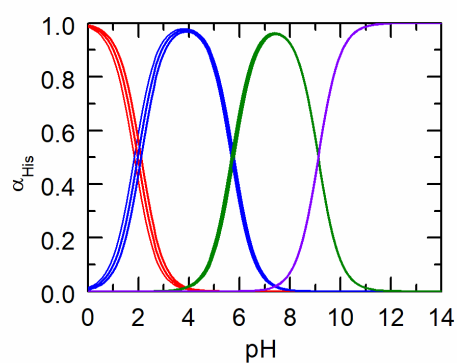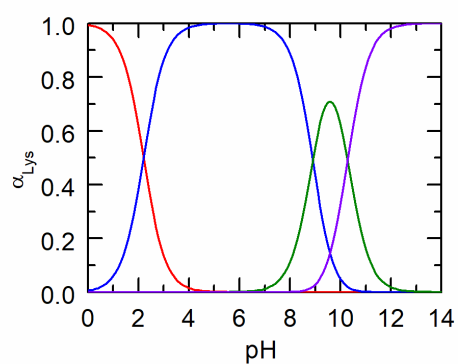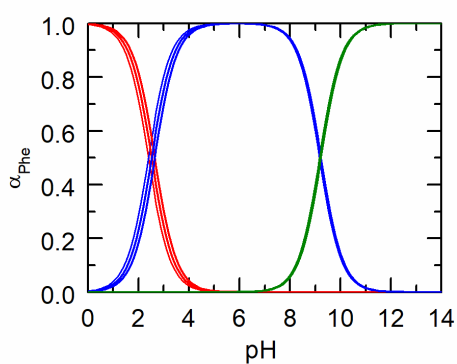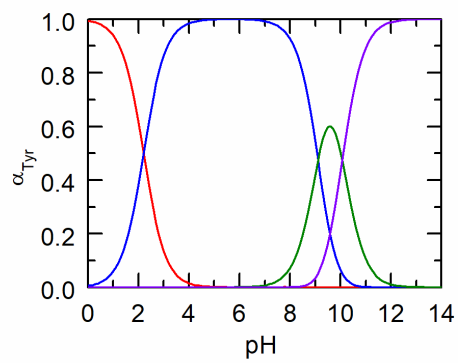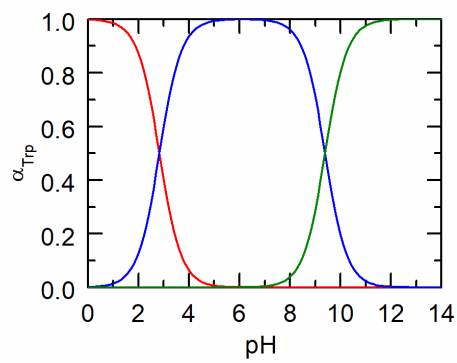

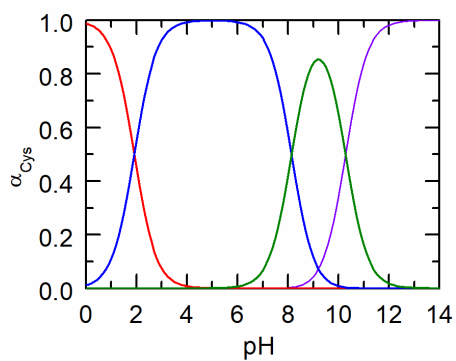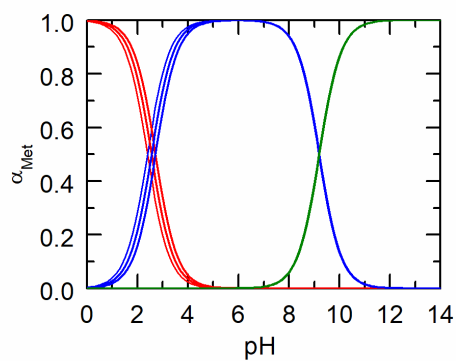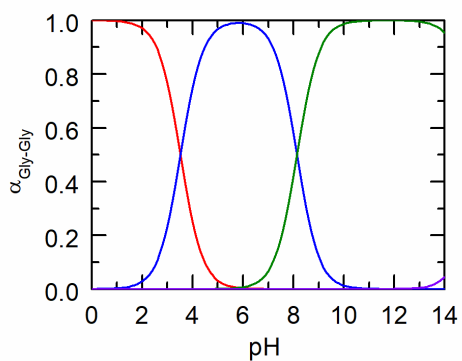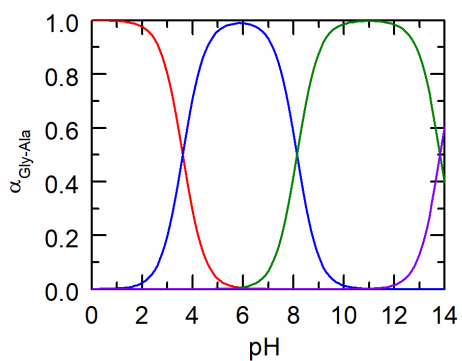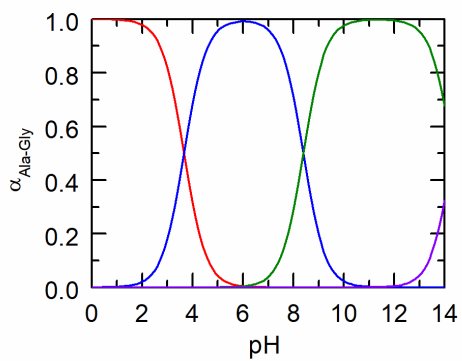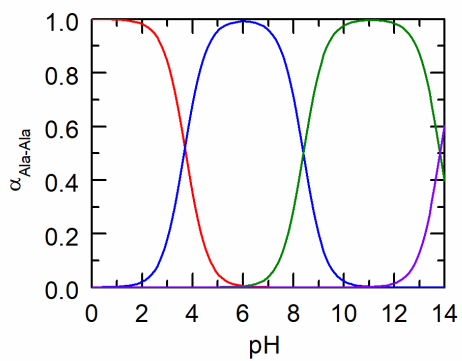

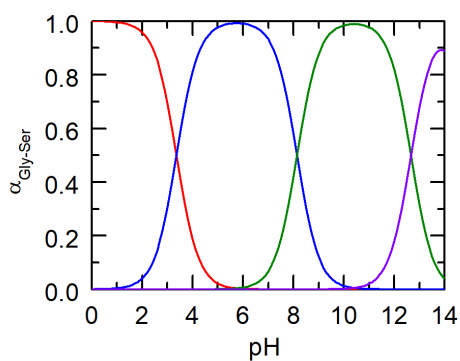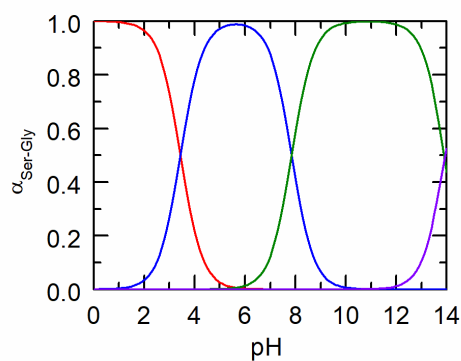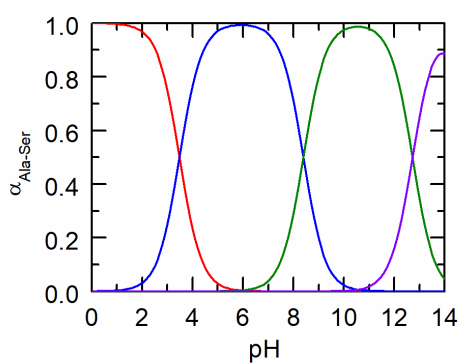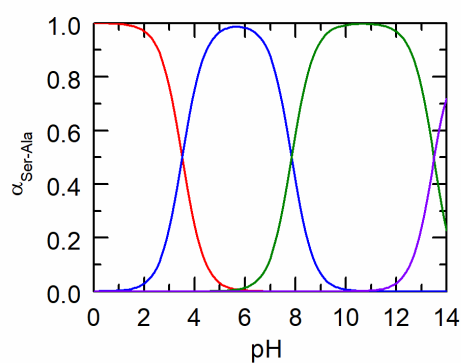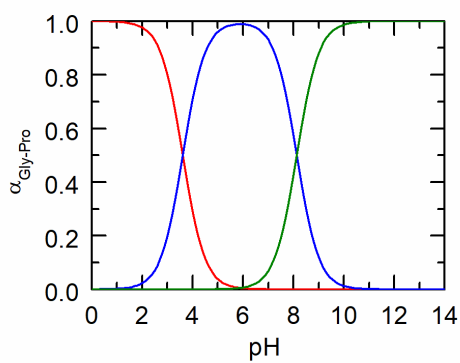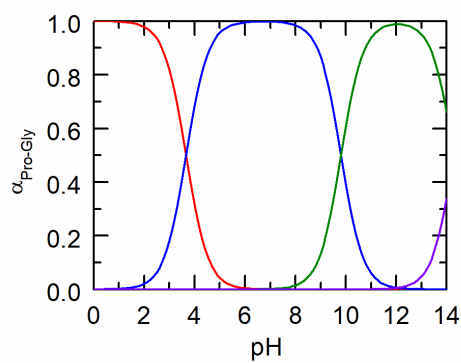

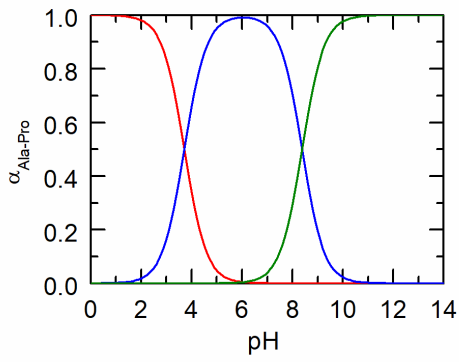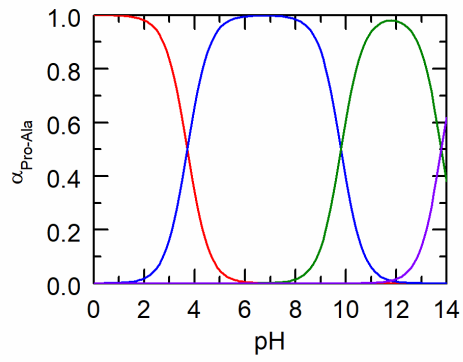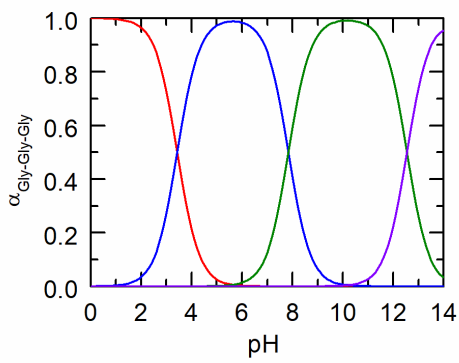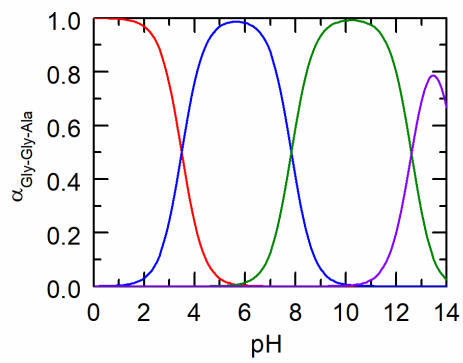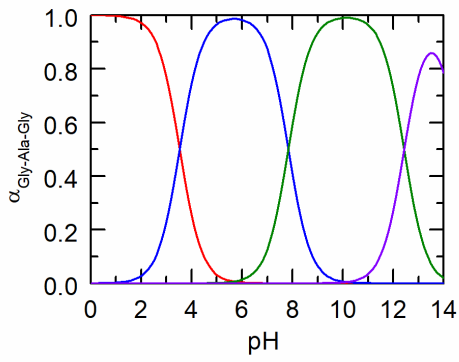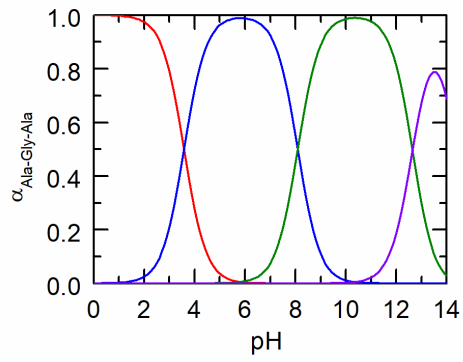

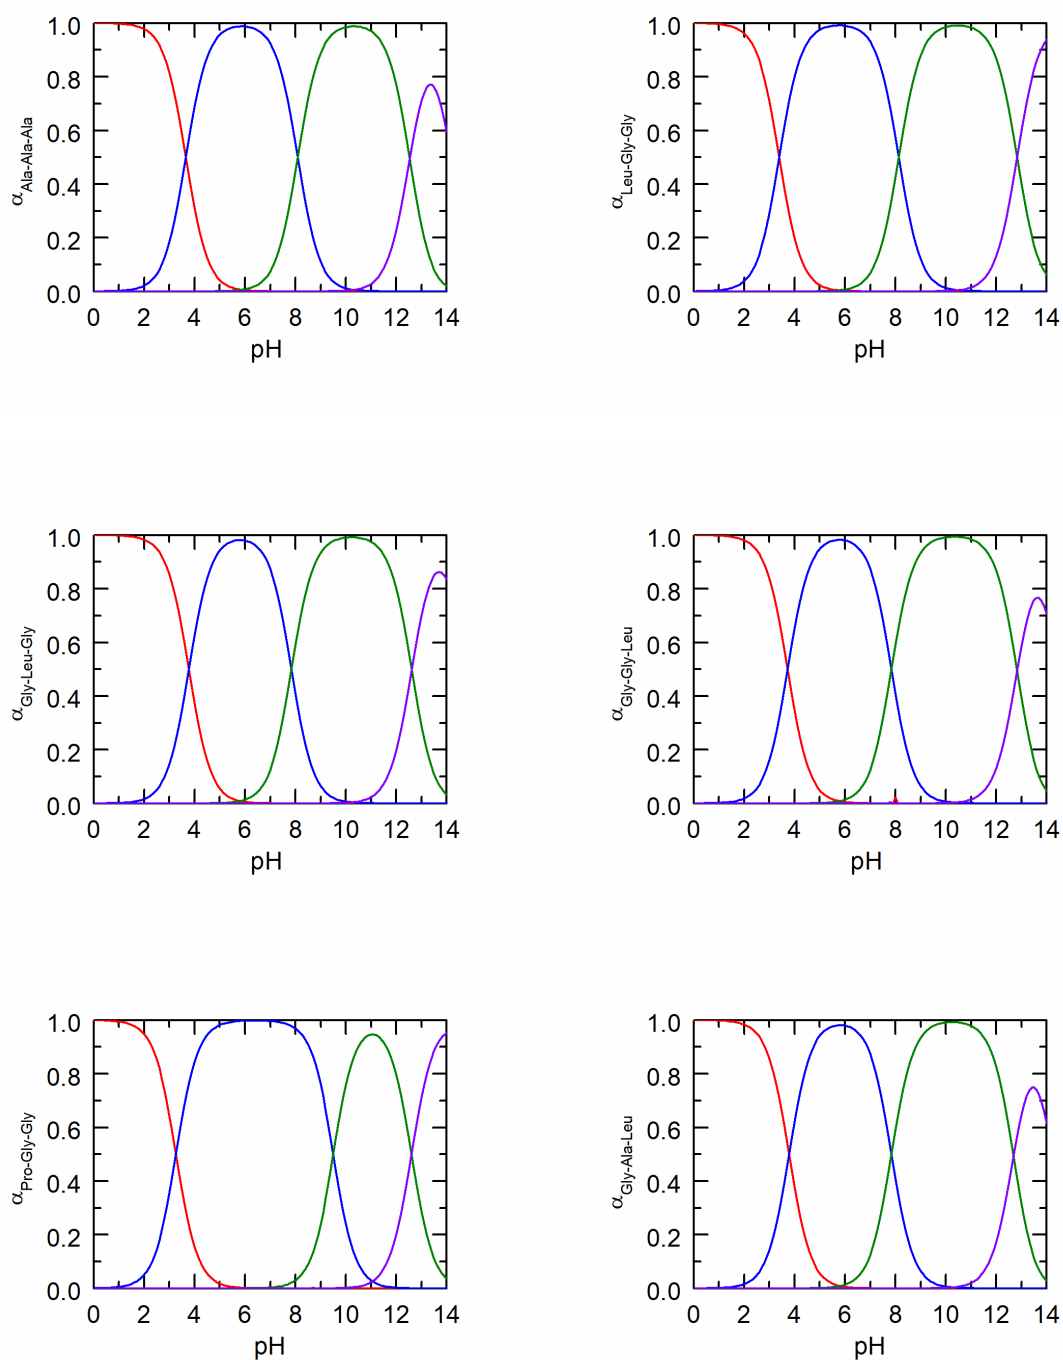

Figure S1 The pH distribution of peptide species in aqueous solution. Lines represent the contribution of species: positive net charged specie (red), zero net charge specie (blue), one negative net charged specie (green), species with double negative charge (violet).

## 5. PC-SAFT parameters

Table S4 PC-SAFT pure-component parameters and binary interaction parameters  $k_{ij}$  according to Equation (7). (1) amino acid/peptide, (2) water, (3) 2-propanol). The ARD values between the PC-SAFT modelled solubility and the experimental solubility data in aqueous solutions with 2-propanol are listed in the last column.

|                         | $m_i^{\text{seg}}$ | $\sigma_i$<br>/ Å | $\sigma_i/k_B$<br>/ K | $\varepsilon^{AiBi}/k_B$<br>/ K | $\kappa^{AiBi}$ | N   | $k_{12}$<br>/ $10^{-2}$  | $k_{13}$<br>/ $10^{-2}$ | $k_{23}$<br>/ $10^{-2}$ | ARD<br>/ % |
|-------------------------|--------------------|-------------------|-----------------------|---------------------------------|-----------------|-----|--------------------------|-------------------------|-------------------------|------------|
| H <sub>2</sub> O        | 1.2047             | <sup>a</sup>      | 353.94                | 2425.67                         | 0.045           | 1/1 | -                        | -                       | -4.4                    | -          |
| 2-propanol <sup>d</sup> | 3.0929             | 3.209             | 208.42                | 2253.90                         | 0.025           | 1/1 | -                        | -                       | -4.4                    | -          |
| Gly <sup>c</sup>        | 4.850              | 2.327             | 216.960               | 2598.060                        | 0.039           | 1/1 | -5.85 <sup>c</sup>       | +15.50                  | -                       | 1.43       |
| Ala <sup>c</sup>        | 5.465              | 2.522             | 287.590               | 3176.600                        | 0.082           | 1/1 | -6.12 <sup>c</sup>       | +3.75                   | -                       | 8.50       |
| Val <sup>b</sup>        | 7.485              | 2.589             | 306.410               | 3183.800                        | 0.039           | 1/1 | -7.57 <sup>b</sup>       | -3.15                   | -                       | 14.88      |
| Leu <sup>b</sup>        | 8.304              | 2.700             | 330.000               | 3600.000                        | 0.020           | 1/1 | -6.39 <sup>b</sup>       | -4.86                   | -                       | 9.74       |
| Ile <sup>b</sup>        | 8.241              | 2.586             | 281.884               | 2207.529                        | 0.001           | 1/1 | -8.75 <sup>b</sup>       | -2.47                   | -                       | 5.21       |
| Pro <sup>b</sup>        | 6.981              | 2.548             | 289.720               | 5527.750                        | 0.036           | 1/1 | -6.99 <sup>b</sup>       | -                       | -                       | -          |
| Ser <sup>b</sup>        | 7.024              | 2.284             | 236.920               | 2671.930                        | 0.039           | 2/1 | -2.57 <sup>b</sup>       | -                       | -                       | -          |
| Thr <sup>b</sup>        | 6.329              | 2.606             | 325.370               | 2519.410                        | 0.039           | 2/1 | -2.78 <sup>b</sup>       | +4.58                   | -                       | 9.33       |
| Asp <sup>d</sup>        | 5.827              | 2.522             | 287.625               | 2544.234                        | 0.041           | 2/1 | +1.45 <sup>d</sup>       | +17.63                  | -                       | 10.01      |
| Asn <sup>b</sup>        | 3.000              | 3.367             | 280.000               | 3265.670                        | 0.044           | 1/2 | +0.00 <sup>b</sup>       | -                       | -                       | -          |
| Glu <sup>d</sup>        | 6.831              | 2.560             | 227.192               | 2544.234                        | 0.041           | 2/1 | -4.45 <sup>d</sup>       | +15.74                  | -                       | 8.25       |
| Gln <sup>d</sup>        | 9.289              | 2.360             | 273.555               | 2637.341                        | 0.020           | 1/2 | -5.18 <sup>d</sup>       | +1.70                   | -                       | 10.04      |
| Arg <sup>b</sup>        | 9.908              | 2.657             | 349.710               | 2555.450                        | 0.039           | 1/3 | -1.45 <sup>b</sup>       | -1.55                   | -                       | 7.37       |
| His <sup>d</sup>        | 9.088              | 2.473             | 281.954               | 2640.981                        | 0.078           | 1/2 | -3.89 <sup>d</sup>       | +3.86                   | -                       | 10.72      |
| Lys <sup>b</sup>        | 11.673             | 2.378             | 301.210               | 3787.310                        | 0.033           | 1/2 | -7.07 <sup>b</sup>       | -                       | -                       | -          |
| Phe <sup>d</sup>        | 9.310              | 2.690             | 391.827               | 3206.094                        | 0.010           | 1/1 | -5.18 <sup>d</sup>       | -8.57                   | -                       | 2.79       |
| Tyr <sup>b</sup>        | 8.139              | 2.280             | 289.370               | 2500.000                        | 0.040           | 2/1 | +2.27 · 10 <sup>-4</sup> | +3.87                   | -                       | 4.35       |
| Trp <sup>d</sup>        | 10.577             | 2.825             | 260.641               | 2563.249                        | 0.024           | 1/2 | -7.68                    | -0.22                   | -                       | 13.64      |
| Cys <sup>b</sup>        | 7.739              | 2.384             | 322.910               | 1964.000                        | 0.010           | 1/2 | -2.35                    | -                       | -                       | -          |
| Met <sup>b</sup>        | 16.026             | 2.150             | 220.370               | 1964.000                        | 0.010           | 1/2 | -1.43                    | -                       | -                       | -          |
| Gly-Gly                 | 7.337              | 2.327             | 216.959               | 2598.060                        | 0.039           | 1/1 | -8.04                    | +13.00                  | -                       | 10.84      |
| Gly-Ala                 | 9.154              | 2.445             | 257.126               | 2946.760                        | 0.065           | 1/1 | -7.60                    | +2.67                   | -                       | 4.82       |
| Ala-Gly                 | 9.206              | 2.423             | 249.314               | 2883.420                        | 0.060           | 1/1 | -8.13                    | +2.67                   | -                       | 12.53      |
| Ala-Ala                 | 9.824              | 2.522             | 287.587               | 3176.595                        | 0.082           | 1/1 | -7.27                    | -2.00                   | -                       | 1.15       |
| Gly-Ser                 | 9.353              | 2.417             | 229.568               | 2645.475                        | 0.039           | 2/1 | -5.94                    | +9.20                   | -                       | 6.56       |
| Ser-Gly                 | 10.671             | 2.304             | 227.583               | 2638.186                        | 0.039           | 2/1 | -7.50                    | +4.06                   | -                       | 10.23      |
| Ala-Ser                 | 9.583              | 2.537             | 256.471               | 2878.429                        | 0.056           | 2/1 | -6.35                    | -0.10                   | -                       | 4.79       |
| Ser-Ala                 | 11.290             | 2.403             | 261.026               | 2924.261                        | 0.060           | 2/1 | -7.30                    | +5.31                   | -                       | 25.64      |
| Gly-Pro                 | 10.671             | 2.474             | 262.800               | 4539.860                        | 0.037           | 1/1 | -8.49                    | -                       | -                       | -          |
| Pro-Gly                 | -                  | -                 | -                     | -                               | -               | -   | -                        | -                       | -                       | -          |
| Ala-Pro                 | -                  | -                 | -                     | -                               | -               | -   | -                        | -                       | -                       | -          |
| Pro-Ala                 | 11.352             | 2.536             | 288.708               | 4415.543                        | 0.058           | 1/1 | -6.48                    | -0.20                   | -                       | 8.61       |
| Gly-Gly-Gly             | 10.156             | 2.410             | 216.959               | 2598.061                        | 0.039           | 1/1 | -7.48                    | +11.70                  | -                       | 3.58       |
| Gly-Gly-Ala             | 12.754             | 2.412             | 245.150               | 2848.850                        | 0.058           | 1/1 | -9.50                    | +1.65                   | -                       | 7.25       |
| Gly-Ala-Gly             | 9.474              | 52.645            | -                     | 2800.426                        | 0.054           | 1/1 | -9.01                    | +9.00                   | -                       | 1.49       |
| Ala-Gly-Ala             | -                  | -                 | -                     | -                               | -               | -   | -                        | -                       | -                       | -          |
| Ala-Ala-Ala             | -                  | -                 | -                     | -                               | -               | -   | -                        | -                       | -                       | -          |
| Leu-Gly-Gly             | 15.697             | 2.501             | 263.725               | 3064.420                        | 0.030           | 1/1 | -9.08                    | -3.70                   | -                       | 2.91       |
| Gly-Leu-Gly             | 13.725             | 2.612             | 263.270               | 3060.300                        | 0.030           | 1/1 | -7.16                    | +0.32                   | -                       | 1.61       |
| Gly-Gly-Leu             | 12.222             | 2.758             | 262.250               | 3100.484                        | 0.020           | 1/1 | -7.05                    | +5.00                   | -                       | 4.56       |
| Gly-Ala-Leu             | 16.350             | 2.567             | 289.303               | 3259.600                        | 0.041           | 1/1 | -7.01                    | -1.00                   | -                       | 1.29       |

<sup>a</sup> Temperature-dependent segment diameter  $\sigma = 2.7927 + 10.11 \exp(-0.01775T) - 1.417 \exp(-0.01146T)$ , <sup>b</sup> pure-component parameters from Held et al.<sup>3</sup>, <sup>c</sup> pure-component parameters from Chua et al.<sup>4</sup>, <sup>d</sup> pure-component parameters from this work, <sup>e</sup> pure-component parameters from Gross and Sadowski<sup>5</sup>

## 6. Melting properties

Table S5 Melting properties used in PC-SAFT: melting temperature  $T_{0i}^{SL}$ , melting enthalpy  $\Delta h_{0i}^{SL}$  and the slope ( $a_{c_{poi}}^L, a_{c_{poi}}^S$ ) and interception ( $b_{c_{poi}}^L, b_{c_{poi}}^S$ ) of the heat capacity of liquid and solid, and difference in the heat capacity at melting temperature  $\Delta c_{p0i}^{SL}(T_{0i}^{SL})$ .

| Amino acid / peptide     | $T_{0i}^{SL}$<br>/K | $\Delta h_{0i}^{SL}$<br>/kJ·mol <sup>-1</sup> | $a_{c_{poi}}^L$<br>/J·mol <sup>-1</sup> ·K <sup>-2</sup> | $b_{c_{poi}}^L$<br>/J·mol <sup>-1</sup> ·K <sup>-1</sup> | $a_{c_{poi}}^S$<br>/J·mol <sup>-1</sup> ·K <sup>-2</sup> | $b_{c_{poi}}^S$<br>/J·mol <sup>-1</sup> ·K <sup>-1</sup> | $\Delta c_{p0i}^{SL}(T_{0i}^{SL})$<br>/J·mol <sup>-1</sup> ·K <sup>-1</sup> |
|--------------------------|---------------------|-----------------------------------------------|----------------------------------------------------------|----------------------------------------------------------|----------------------------------------------------------|----------------------------------------------------------|-----------------------------------------------------------------------------|
| Gly                      | 569                 | 24.96                                         | 0.225                                                    | 62.681                                                   | 0.266                                                    | 21.033                                                   | 18.59                                                                       |
| Ala                      | 608                 | 25.99                                         | 0.267                                                    | 64.148                                                   | 0.324                                                    | 24.225                                                   | 5.26                                                                        |
| Val                      | 529                 | 46.72                                         | 0.351                                                    | 106.488                                                  | 0.453                                                    | 32.573                                                   | 20.00                                                                       |
| Leu                      | 518                 | 49.09                                         | 0.525                                                    | 71.622                                                   | 0.577                                                    | 24.322                                                   | 10.15                                                                       |
| Ile                      | 595                 | 47.11                                         | 0.459                                                    | 87.228                                                   | 0.512                                                    | 35.624                                                   | 20.39                                                                       |
| Pro                      | -                   | -                                             | -                                                        | -                                                        | -                                                        | -                                                        | -                                                                           |
| Ser <sup>c</sup>         | 519                 | 32.98                                         | 0.267                                                    | 121.318                                                  | 0.346                                                    | 31.028                                                   | 49.38                                                                       |
| Thr                      | 587                 | 36.64                                         | 0.379                                                    | 125.276                                                  | 0.406                                                    | 47.019                                                   | 62.18                                                                       |
| Asp                      | 610                 | 35.73                                         | 0.176                                                    | 213.341                                                  | 0.397                                                    | 37.182                                                   | 41.37                                                                       |
| Asn                      | -                   | -                                             | -                                                        | -                                                        | -                                                        | -                                                        | -                                                                           |
| Glu                      | 566                 | 48.24                                         | 0.321                                                    | 147.115                                                  | 0.481                                                    | 32.014                                                   | 24.33                                                                       |
| Gln                      | 589                 | 51.96                                         | 0.474                                                    | 129.528                                                  | 0.500                                                    | 34.849                                                   | 79.19                                                                       |
| Arg                      | 558                 | 28.64                                         | 0.326                                                    | 265.689                                                  | 0.690                                                    | 27.698                                                   | 34.83                                                                       |
| His                      | 619                 | 56.01                                         | 0.507                                                    | 152.902                                                  | 0.537                                                    | 21.854                                                   | 112.80                                                                      |
| Lys                      | -                   | -                                             | -                                                        | -                                                        | -                                                        | -                                                        | -                                                                           |
| Phe                      | 579                 | 60.66                                         | 0.496                                                    | 280.823                                                  | 0.635                                                    | 15.731                                                   | 184.37                                                                      |
| Tyr                      | 678                 | 49.77                                         | 0.664                                                    | 93.511                                                   | 0.681                                                    | 19.229                                                   | 62.74                                                                       |
| Trp                      | 620                 | 65.55                                         | 0.351                                                    | 289.570                                                  | 0.758                                                    | 15.771                                                   | 21.82                                                                       |
| Cys                      | -                   | -                                             | -                                                        | -                                                        | -                                                        | -                                                        | -                                                                           |
| Met                      | -                   | -                                             | -                                                        | -                                                        | -                                                        | -                                                        | -                                                                           |
| Gly-Gly                  | 593                 | 42.18                                         | 0.256                                                    | 185.660                                                  | 0.415                                                    | 41.175                                                   | 50.469                                                                      |
| Gly-Ala                  | 551                 | 38.38                                         | 0.253                                                    | 219.937                                                  | 0.474                                                    | 44.123                                                   | 54.219                                                                      |
| Ala-Gly                  | 611                 | 47.03                                         | 0.357                                                    | 169.339                                                  | 0.475                                                    | 41.054                                                   | 55.956                                                                      |
| Ala-Ala                  | 606                 | 41.44                                         | 0.396                                                    | 175.923                                                  | 0.503                                                    | 49.918                                                   | 60.971                                                                      |
| Gly-Ser                  | 530                 | 47.12                                         | 0.323                                                    | 222.766                                                  | 0.546                                                    | 38.543                                                   | 65.630                                                                      |
| Ser-Gly                  | 553                 | 66.37                                         | 0.293                                                    | 247.192                                                  | 0.564                                                    | 37.212                                                   | 60.533                                                                      |
| Ala-Ser                  | 556                 | 46.65                                         | 0.396                                                    | 217.162                                                  | 0.641                                                    | 33.400                                                   | 47.609                                                                      |
| Ser-Ala                  | 609                 | 79.03                                         | 0.328                                                    | 254.405                                                  | 0.585                                                    | 44.293                                                   | 53.470                                                                      |
| Gly-Pro                  | 541                 | 25.06                                         | 0.604                                                    | 96.144                                                   | 0.658                                                    | 31.474                                                   | 35.794                                                                      |
| Pro-Gly <sup>d</sup>     | -                   | -                                             | -                                                        | -                                                        | -                                                        | -                                                        | -                                                                           |
| Ala-Pro <sup>e</sup>     | -                   | -                                             | -                                                        | -                                                        | -                                                        | -                                                        | -                                                                           |
| Pro-Ala                  | 624                 | 41.93                                         | 0.525                                                    | 135.934                                                  | 0.631                                                    | 47.121                                                   | 22.582                                                                      |
| Gly-Gly-Gly              | 594                 | 52.64                                         | 0.418                                                    | 244.477                                                  | 0.630                                                    | 48.568                                                   | 70.058                                                                      |
| Gly-Gly-Ala              | 592                 | 70.15                                         | 0.503                                                    | 223.719                                                  | 0.675                                                    | 57.131                                                   | 64.940                                                                      |
| Gly-Ala-Gly              | 623                 | 60.03                                         | 0.528                                                    | 223.619                                                  | 0.675                                                    | 55.335                                                   | 77.284                                                                      |
| Ala-Gly-Ala <sup>d</sup> | -                   | -                                             | -                                                        | -                                                        | -                                                        | -                                                        | -                                                                           |
| Ala-Ala-Ala <sup>d</sup> | -                   | -                                             | -                                                        | -                                                        | -                                                        | -                                                        | -                                                                           |
| Leu-Gly-Gly              | 530                 | 73.03                                         | 0.390                                                    | 428.149                                                  | 0.885                                                    | 55.252                                                   | 159.252                                                                     |
| Gly-Leu-Gly              | 545                 | 65.43                                         | 0.797                                                    | 251.747                                                  | 0.888                                                    | 63.721                                                   | 138.565                                                                     |
| Gly-Gly-Leu              | 521                 | 59.63                                         | 0.621                                                    | 409.351                                                  | 1.028                                                    | 37.967                                                   | 110.302                                                                     |
| Gly-Ala-Leu              | 578                 | 77.06                                         | 0.576                                                    | 394.529                                                  | 0.946                                                    | 69.079                                                   | 111.494                                                                     |

## 7. Solubility data and pH values

Table S6 Solubility  $w_{\text{Solute}}^{\text{sat}}$  (and  $w_{\text{Solute,pH=7}}^{\text{sat}}$ ) of amino acids and peptides in aqueous-2-propanol saturated unbuffered (and shifted to pH = 7 using Henderson Hasselbalch eq. Table S3) solutions at  $T = 298.15$  K and  $p = 1$  atm, pH values of saturated solutions under study (uncertainties represents the standard deviations of multiple measurements, isoelectric point (pI) from the platform Chemicalize<sup>®</sup> and literature for amino acids by Dey et al.<sup>6</sup>. Additionally information about a crystal structure change using PXRD and the PC-SAFT modeled activity coefficients are given.

| Solute | $w_{\text{H}_2\text{O}}$<br>/ $\text{g} \cdot \text{g}^{-1}$ | $w_{2\text{-prop.}}$<br>/ $\text{g} \cdot \text{g}^{-1}$ | $w_{\text{Solute}}^{\text{sat}}$<br>/ $\text{g} \cdot \text{g}^{-1}$ | $\text{pH}^{\text{sat}}$ | pI <sup>6</sup> | $w_{\text{Solute,pH=7}}^{\text{sat}}$<br>/ $\text{g} \cdot \text{g}^{-1}$ | PXRD transitions | $\gamma^{\text{L}}$ |
|--------|--------------------------------------------------------------|----------------------------------------------------------|----------------------------------------------------------------------|--------------------------|-----------------|---------------------------------------------------------------------------|------------------|---------------------|
| Gly    | 1.000                                                        | 0.000                                                    | $0.2019 \pm 0.0020$                                                  | $6.32 \pm 0.04$          | 5.97            |                                                                           | Polymorphs       | 0.306               |
|        | 0.900                                                        | 0.100                                                    | $0.1366 \pm 0.0018$                                                  | $5.8 \pm 0.01$           |                 |                                                                           |                  |                     |
|        | 0.800                                                        | 0.198                                                    | $0.0885 \pm 0.0021$                                                  | $6.23 \pm 0.01$          |                 |                                                                           |                  |                     |
|        | 0.703                                                        | 0.297                                                    | $0.0587 \pm 0.002$                                                   | $6.26 \pm 0.01$          |                 |                                                                           |                  |                     |
| Ala    | 1.000                                                        | 0.000                                                    | $0.1415 \pm 0.0015$                                                  | $6.33 \pm 0.02$          | 6.00            |                                                                           |                  | 0.236               |
|        | 0.900                                                        | 0.100                                                    | $0.0987 \pm 0.0010$                                                  | $6.31 \pm 0.03$          |                 |                                                                           |                  | 0.312               |
|        | 0.800                                                        | 0.200                                                    | $0.0649 \pm 0.0010$                                                  | $6.29 \pm 0.03$          |                 |                                                                           |                  | 0.474               |
|        | 0.700                                                        | 0.300                                                    | $0.0457 \pm 0.0016$                                                  | $6.39 \pm 0.03$          |                 |                                                                           |                  | 0.730               |
| Val    | 1.000                                                        | 0.000                                                    | $0.0553 \pm 0.0006$                                                  | $6.08 \pm 0.07$          | 5.96            |                                                                           |                  | 0.060               |
|        | 0.900                                                        | 0.100                                                    | $0.0401 \pm 0.0004$                                                  | $6.10 \pm 0.03$          |                 |                                                                           |                  | 0.073               |
|        | 0.800                                                        | 0.200                                                    | $0.0258 \pm 0.0014$                                                  | $6.22 \pm 0.05$          |                 |                                                                           |                  | 0.104               |
|        | 0.701                                                        | 0.299                                                    | $0.0193 \pm 0.0017$                                                  | $6.32 \pm 0.07$          |                 |                                                                           |                  | 0.155               |
| Leu    | 1.000                                                        | 0.000                                                    | $0.0237 \pm 0.0003$                                                  | $5.68 \pm 0.15$          | 5.98            |                                                                           |                  | 0.130               |
|        | 0.900                                                        | 0.100                                                    | $0.0184 \pm 0.0005$                                                  | $5.56 \pm 0.04$          |                 |                                                                           |                  | 0.140               |
|        | 0.800                                                        | 0.200                                                    | $0.0133 \pm 0.0010$                                                  | $5.69 \pm 0.04$          |                 |                                                                           |                  | 0.175               |
|        | 0.700                                                        | 0.300                                                    | $0.0095 \pm 0.0013$                                                  | $5.89 \pm 0.01$          |                 |                                                                           |                  | 0.240               |
| Ile    | 1.000                                                        | 0.000                                                    | $0.0329 \pm 0.0003$                                                  | $6.22 \pm 0.14$          | 6.02            |                                                                           |                  | 0.043               |
|        | 0.900                                                        | 0.100                                                    | $0.0248 \pm 0.0004$                                                  | $5.78 \pm 0.51$          |                 |                                                                           |                  | 0.052               |
|        | 0.800                                                        | 0.200                                                    | $0.0175 \pm 0.0003$                                                  | $6.24 \pm 0.03$          |                 |                                                                           |                  | 0.070               |
|        | 0.701                                                        | 0.299                                                    | $0.0149 \pm 0.0009$                                                  | $6.34 \pm 0.73$          |                 |                                                                           |                  | 0.102               |
| Pro    | 1.000                                                        | 0.000                                                    | $0.6365 \pm 0.0154$                                                  | $7.26 \pm 0.07$          | 6.30            |                                                                           | Monohydrate      |                     |
|        | 0.900                                                        | 0.100                                                    | $0.5481 \pm 0.0183$                                                  | $7.43 \pm 0.01$          |                 |                                                                           |                  |                     |
|        | 0.800                                                        | 0.200                                                    | $0.5047 \pm 0.0047$                                                  | $7.39 \pm 0.01$          |                 |                                                                           |                  |                     |
|        | 0.701                                                        | 0.299                                                    | $0.4510 \pm 0.0040$                                                  | $7.38 \pm 0.01$          |                 |                                                                           |                  |                     |
| Ser    | 1.000                                                        | 0.000                                                    | $0.2867 \pm 0.0123$                                                  | $6.01 \pm 0.02$          | 5.68            |                                                                           | Monohydrate      |                     |
|        | 0.900                                                        | 0.100                                                    | $0.2128 \pm 0.0027$                                                  | $5.93 \pm 0.01$          |                 |                                                                           |                  |                     |
|        | 0.801                                                        | 0.199                                                    | $0.1365 \pm 0.0013$                                                  | $5.98 \pm 0.01$          |                 |                                                                           |                  |                     |
|        | 0.702                                                        | 0.298                                                    | $0.0865 \pm 0.0006$                                                  | $6.06 \pm 0.01$          |                 |                                                                           |                  |                     |
| Thr    | 1.000                                                        | 0.000                                                    | $0.0894 \pm 0.0008$                                                  | $5.87 \pm 0.01$          | 5.60            |                                                                           |                  | 0.465               |
|        | 0.900                                                        | 0.100                                                    | $0.0559 \pm 0.0006$                                                  | $5.72 \pm 0.04$          |                 |                                                                           |                  | 0.667               |
|        | 0.800                                                        | 0.200                                                    | $0.0339 \pm 0.0006$                                                  | $5.82 \pm 0.04$          |                 |                                                                           |                  | 1.121               |
|        | 0.700                                                        | 0.300                                                    | $0.0214 \pm 0.0004$                                                  | $5.90 \pm 0.04$          |                 |                                                                           |                  | 1.892               |
| Asp    | 1.000                                                        | 0.000                                                    | $0.0057 \pm 0.0002$                                                  | $3.05 \pm 0.01$          | 2.77            |                                                                           |                  | 5.819               |
|        | 0.900                                                        | 0.100                                                    | $0.0027 \pm 0.0005$                                                  | $3.09 \pm 0.03$          |                 |                                                                           |                  | 9.098               |
|        | 0.800                                                        | 0.200                                                    | $0.0016 \pm 0.0001$                                                  | $3.26 \pm 0.03$          |                 |                                                                           |                  | 16.215              |
|        | 0.700                                                        | 0.300                                                    | $0.0009 \pm 0.0001$                                                  | $3.44 \pm 0.05$          |                 |                                                                           |                  | 28.003              |
| Asn    | 1.000                                                        | 0.000                                                    | $0.0267 \pm 0.0016$                                                  | $5.13 \pm 0.05$          | 5.41            |                                                                           | Monohydrate      |                     |
|        | 0.900                                                        | 0.100                                                    | $0.0139 \pm 0.0009$                                                  | $5.12 \pm 0.03$          |                 |                                                                           |                  |                     |
|        | 0.800                                                        | 0.200                                                    | $0.0083 \pm 0.0002$                                                  | $5.25 \pm 0.03$          |                 |                                                                           |                  |                     |
|        | 0.700                                                        | 0.300                                                    | $0.0049 \pm 0.0004$                                                  | $5.35 \pm 0.04$          |                 |                                                                           |                  |                     |
| Glu    | 1.000                                                        | 0.000                                                    | $0.0088 \pm 0.0003$                                                  | $3.28 \pm 0.04$          | 3.22            |                                                                           |                  | 0.324               |
|        | 0.900                                                        | 0.100                                                    | $0.0049 \pm 0.0001$                                                  | $3.33 \pm 0.03$          |                 |                                                                           |                  | 0.481               |
|        | 0.800                                                        | 0.200                                                    | $0.0030 \pm 0.0001$                                                  | $3.49 \pm 0.03$          |                 |                                                                           |                  | 0.820               |
|        | 0.700                                                        | 0.300                                                    | $0.0021 \pm 0.0001$                                                  | $3.70 \pm 0.03$          |                 |                                                                           |                  | 1.380               |
| Gln    | 1.000                                                        | 0.000                                                    | $0.0405 \pm 0.0002$                                                  | $5.01 \pm 0.04$          | 5.65            |                                                                           |                  | 0.114               |
|        | 0.900                                                        | 0.100                                                    | $0.0260 \pm 0.0004$                                                  | $4.31 \pm 0.06$          |                 |                                                                           |                  | 0.156               |
|        | 0.800                                                        | 0.200                                                    | $0.0163 \pm 0.0005$                                                  | $4.48 \pm 0.03$          |                 |                                                                           |                  | 0.248               |
|        | 0.700                                                        | 0.300                                                    | $0.0105 \pm 0.0004$                                                  | $4.67 \pm 0.03$          |                 |                                                                           |                  | 0.403               |
| Arg    | 1.000                                                        | 0.000                                                    | $0.1639 \pm 0.0034$                                                  | $11.45 \pm 0.02$         | 10.8            |                                                                           |                  | 0.967               |
|        | 0.900                                                        | 0.100                                                    | $0.1437 \pm 0.0112$                                                  | $11.34 \pm 0.04$         |                 |                                                                           |                  | 1.017               |
|        | 0.800                                                        | 0.200                                                    | $0.1108 \pm 0.0093$                                                  | $11.40 \pm 0.04$         |                 |                                                                           |                  | 1.258               |
|        | 0.700                                                        | 0.300                                                    | $0.0883 \pm 0.0035$                                                  | $11.46 \pm 0.04$         |                 |                                                                           |                  | 1.729               |
| His    | 1.000                                                        | 0.000                                                    | $0.0414 \pm 0.0003$                                                  | $7.75 \pm 0.05$          | 7.59            |                                                                           |                  | 0.205               |
|        | 0.900                                                        | 0.100                                                    | $0.0266 \pm 0.0003$                                                  | $7.65 \pm 0.03$          |                 |                                                                           |                  | 0.278               |
|        | 0.800                                                        | 0.200                                                    | $0.0172 \pm 0.0004$                                                  | $7.62 \pm 0.04$          |                 |                                                                           |                  | 0.441               |
|        | 0.700                                                        | 0.300                                                    | $0.0113 \pm 0.0003$                                                  | $7.57 \pm 0.03$          |                 |                                                                           |                  | 0.720               |
| Lys    | 1.000                                                        | 0.000                                                    | $0.5197 \pm 0.1256$                                                  | $10.66 \pm 0.10$         | 9.74            |                                                                           |                  |                     |
|        | 0.900                                                        | 0.100                                                    | $0.6294 \pm 0.0278$                                                  | $10.51 \pm 0.05$         |                 |                                                                           |                  |                     |
|        | 0.800                                                        | 0.200                                                    | $0.5907 \pm 0.0110$                                                  | $10.49 \pm 0.04$         |                 |                                                                           |                  |                     |
|        | 0.700                                                        | 0.300                                                    | $0.6177 \pm 0.0189$                                                  | $10.26 \pm 0.06$         |                 |                                                                           |                  |                     |
| Phe    | 1.000                                                        | 0.000                                                    | $0.0291 \pm 0.0007$                                                  | $5.99 \pm 0.20$          | 5.48            |                                                                           |                  | 1.750               |
|        | 0.900                                                        | 0.100                                                    | $0.0216 \pm 0.0001$                                                  | $5.64 \pm 0.04$          |                 |                                                                           |                  | 1.935               |



| Journal Name     |       |       |                     |             |      | ARTICLE         |
|------------------|-------|-------|---------------------|-------------|------|-----------------|
|                  | 0.800 | 0.200 | 0.0167 ± 0.0004     | 5.97 ± 0.49 |      | 2.569           |
|                  | 0.700 | 0.300 | 0.0163 ± 0.0007     | 5.75 ± 0.03 |      | 3.784           |
| Tyr              | 1.000 | 0.000 | 0.0006 ± 0.0001     | 5.77 ± 0.34 | 5.66 | 11.158          |
|                  | 0.900 | 0.100 | 0.000444 ± 0.000016 | 6.44 ± 0.04 |      | 11.582          |
|                  | 0.800 | 0.200 | 0.000354 ± 0.000013 | 5.99 ± 0.04 |      | 13.605          |
| Trp              | 0.700 | 0.300 | 0.000243 ± 0.000026 | 5.91 ± 0.05 |      | 17.208          |
|                  | 1.000 | 0.000 | 0.0138 ± 0.0001     | 5.08 ± 0.11 | 5.89 | 0.021           |
|                  | 0.900 | 0.100 | 0.0095 ± 0.0029     | 5.85 ± 0.04 |      | 0.017           |
|                  | 0.800 | 0.200 | 0.0123 ± 0.0021     | 5.41 ± 0.04 |      | 0.016           |
| Cys              | 0.700 | 0.300 | 0.0129 ± 0.0007     | 5.15 ± 0.04 |      | 0.019           |
|                  | 1.000 | 0.000 | 0.0813b             | 5.14 ± 0.03 | 5.74 | Polymorph       |
|                  | 0.900 | 0.100 | 0.0951 ± 0.0010     | 5.20 ± 0.05 |      |                 |
|                  | 0.800 | 0.200 | 0.0605 ± 0.0006     | 5.31 ± 0.04 |      |                 |
| Met <sup>a</sup> | 0.700 | 0.300 | 0.0414 ± 0.0005     | 5.42 ± 0.03 |      |                 |
|                  | 1.000 | 0.000 | 0.0536 ± 0.0014     | 5.91 ± 0.03 | 5.07 |                 |
|                  | 0.900 | 0.100 | 0.0329 ± 0.0060     | 6.00 ± 0.05 |      |                 |
|                  | 0.800 | 0.200 | 0.0298 ± 0.0054     | 6.00 ± 0.03 |      |                 |
|                  | 0.700 | 0.300 | 0.0198 ± 0.0006     | 6.00 ± 0.05 |      |                 |
| Gly-Gly          | 1.000 | 0.000 | 0.1948 ± 0.0040     | 5.85 ± 0.01 | 5.83 | 0.2048 ± 0.0040 |
|                  | 0.900 | 0.100 | 0.0944 ± 0.0195     | 5.79 ± 0.01 |      | 0.1004 ± 0.0195 |
|                  | 0.801 | 0.199 | 0.0587 ± 0.0008     | 5.83 ± 0.01 |      | 0.0624 ± 0.0008 |
|                  | 0.702 | 0.298 | 0.0319 ± 0.0005     | 5.88 ± 0.01 |      | 0.0339 ± 0.0005 |
| Gly-Ala          | 1.000 | 0.000 | 0.4019 ± 0.0040     | 6.08 ± 0.02 | 5.88 | 0.4172 ± 0.0040 |
|                  | 0.901 | 0.099 | 0.3501 ± 0.0026     | 6.07 ± 0.01 |      | 0.3728 ± 0.0026 |
|                  | 0.800 | 0.200 | 0.2791 ± 0.0011     | 6.10 ± 0.01 |      | 0.2967 ± 0.0011 |
|                  | 0.703 | 0.297 | 0.2133 ± 0.0021     | 6.14 ± 0.01 |      | 0.2265 ± 0.0021 |
| Ala-Gly          | 1.000 | 0.000 | 0.1745 ± 0.0010     | 5.85 ± 0.07 | 6.03 | 0.1792 ± 0.0010 |
|                  | 0.901 | 0.099 | 0.1213 ± 0.0002     | 5.85 ± 0.03 |      | 0.1252 ± 0.0002 |
|                  | 0.800 | 0.200 | 0.0709 ± 0.0016     | 5.90 ± 0.01 |      | 0.0732 ± 0.0016 |
|                  | 0.701 | 0.299 | 0.0427 ± 0.0008     | 5.91 ± 0.08 |      | 0.0441 ± 0.0008 |
| Ala-Ala          | 1.000 | 0.000 | 0.2895 ± 0.0100     | 5.77 ± 0.02 | 6.06 | 0.2959 ± 0.0200 |
|                  | 0.901 | 0.099 | 0.2780 ± 0.0021     | 5.87 ± 0.02 |      | 0.2869 ± 0.0021 |
|                  | 0.801 | 0.199 | 0.2126 ± 0.0017     | 5.91 ± 0.01 |      | 0.2195 ± 0.0017 |
|                  | 0.704 | 0.296 | 0.1594 ± 0.0015     | 6.04 ± 0.01 |      | 0.1646 ± 0.0015 |
| Gly-Ser          | 1.000 | 0.000 | 0.2894 ± 0.0110     | 5.73 ± 0.03 | 5.75 | 0.3029 ± 0.0110 |
|                  | 0.900 | 0.100 | 0.2115 ± 0.0046     | 5.73 ± 0.01 |      | 0.2255 ± 0.0046 |
|                  | 0.803 | 0.197 | 0.1157 ± 0.0026     | 5.64 ± 0.01 |      | 0.1232 ± 0.0026 |
|                  | 0.703 | 0.297 | 0.0644 ± 0.0081     | 5.69 ± 0.01 |      | 0.0686 ± 0.0081 |
| Ser-Gly          | 1.000 | 0.000 | 0.0430 ± 0.0010     | 5.14 ± 0.01 | 5.65 | 0.0478 ± 0.0010 |
|                  | 0.900 | 0.100 | 0.0286 ± 0.0003     | 5.20 ± 0.01 |      | 0.0320 ± 0.0003 |
|                  | 0.800 | 0.200 | 0.0162 ± 0.0002     | 5.26 ± 0.01 |      | 0.0182 ± 0.0002 |
|                  | 0.700 | 0.300 | 0.0106 ± 0.0005     | 5.38 ± 0.01 |      | 0.0119 ± 0.0005 |
| Ala-Ser          | 1.000 | 0.000 | 0.3325 ± 0.0130     | 5.70 ± 0.01 | 5.94 | 0.3401 ± 0.0130 |
|                  | 0.900 | 0.100 | 0.3366 ± 0.0019     | 5.66 ± 0.03 |      | 0.3482 ± 0.0019 |
|                  | 0.800 | 0.200 | 0.3134 ± 0.0375     | 5.68 ± 0.03 |      | 0.3242 ± 0.0375 |
|                  | 0.700 | 0.300 | 0.2097 ± 0.0274     | 5.75 ± 0.04 |      | 0.2169 ± 0.0274 |
| Ser-Ala          | 1.000 | 0.000 | 0.0046 ± 0.0010     | 5.09 ± 0.01 | 5.68 | 0.0051 ± 0.0010 |
|                  | 0.900 | 0.100 | 0.0024 ± 0.0006     | 5.10 ± 0.01 |      | 0.0027 ± 0.0006 |
|                  | 0.800 | 0.200 | 0.0005 ± 0.0002     | 5.11 ± 0.09 |      | 0.0006 ± 0.0002 |
|                  | 0.700 | 0.300 | 0.0003 ± 0.0003     | 5.24 ± 0.01 |      | 0.0005 ± 0.0003 |
| Gly-Pro          | 1.000 | 0.000 | 0.6638 ± 0.1240     | 6.88 ± 0.01 | 5.87 | 0.6682 ± 0.1240 |
|                  | 0.900 | 0.100 | 0.5475 ± 0.0153     | 6.74 ± 0.01 |      | 0.5675 ± 0.0153 |
|                  | 0.804 | 0.196 | 0.5182 ± 0.0053     | 6.80 ± 0.01 |      | 0.5338 ± 0.0053 |
|                  | 0.700 | 0.300 | 0.5012 ± 0.0152     | 6.84 ± 0.01 |      | 0.5135 ± 0.0152 |
| Pro-Gly          | 1.000 | 0.000 | 0.1941 ± 0.0080     | 6.02 ± 0.01 | 6.74 | 0.1937 ± 0.0080 |
|                  | 0.900 | 0.100 | 0.1560 ± 0.0021     | 6.05 ± 0.01 |      | 0.1557 ± 0.0021 |
|                  | 0.802 | 0.198 | 0.0987 ± 0.0067     | 6.08 ± 0.01 |      | 0.0985 ± 0.0067 |
|                  | 0.701 | 0.299 | 0.0691 ± 0.0029     | 6.14 ± 0.01 |      | 0.0690 ± 0.0029 |
| Ala-Pro          | 1.000 | 0.000 | 0.5141 ± 0.0150     | 6.39 ± 0.01 | 6.05 | 0.5221 ± 0.0150 |
|                  | 0.900 | 0.100 | 0.5342 ± 0.0078     | 6.36 ± 0.05 |      | 0.5523 ± 0.0078 |
|                  | 0.800 | 0.200 | 0.4898 ± 0.0159     | 6.42 ± 0.04 |      | 0.5057 ± 0.0159 |
|                  | 0.700 | 0.300 | 0.4733 ± 0.0077     | 6.46 ± 0.03 |      | 0.4882 ± 0.0077 |
| Pro-Ala          | 1.000 | 0.000 | 0.0518 ± 0.0010     | 6.03 ± 0.01 | 6.76 | 0.0516 ± 0.0010 |
|                  | 0.900 | 0.100 | 0.0377 ± 0.0008     | 5.90 ± 0.03 |      | 0.0376 ± 0.0008 |
|                  | 0.800 | 0.200 | 0.0210 ± 0.0008     | 6.00 ± 0.04 |      | 0.0209 ± 0.0008 |
|                  | 0.700 | 0.300 | 0.0132 ± 0.0008     | 6.11 ± 0.03 |      | 0.0131 ± 0.0008 |
| Gly-Gly-Gly      | 1.000 | 0.000 | 0.0612 ± 0.0010     | 5.65 ± 0.02 | 5.64 | 0.0688 ± 0.0010 |
|                  | 0.900 | 0.100 | 0.0308 ± 0.0008     | 5.69 ± 0.03 |      | 0.0348 ± 0.0008 |
|                  | 0.800 | 0.200 | 0.0144 ± 0.0005     | 5.74 ± 0.03 |      | 0.0162 ± 0.0005 |
|                  | 0.700 | 0.300 | 0.0072 ± 0.0009     | 5.83 ± 0.03 |      | 0.0082 ± 0.0009 |
| Gly-Gly-Ala      | 1.000 | 0.000 | 0.0448 ± 0.0010     | 5.43 ± 0.02 | 5.67 | 0.0503 ± 0.0010 |
|                  | 0.900 | 0.100 | 0.0254 ± 0.0006     | 5.50 ± 0.03 |      | 0.0287 ± 0.0006 |
|                  | 0.800 | 0.200 | 0.0122 ± 0.0002     | 5.56 ± 0.04 |      | 0.0137 ± 0.0015 |

|                    |       |       |                 |             |      |                 |                    |
|--------------------|-------|-------|-----------------|-------------|------|-----------------|--------------------|
| <i>Gly-Ala-Gly</i> | 0.700 | 0.300 | 0.0068 ± 0.0001 | 5.69 ± 0.04 |      | 0.0077 ± 0.0016 | 0.027              |
|                    | 1.000 | 0.000 | 0.0491 ± 0.0010 | 4.65 ± 0.01 | 5.69 | 0.0520 ± 0.0010 | 0.042              |
|                    | 0.900 | 0.100 | 0.0265 ± 0.0002 | 4.70 ± 0.04 |      | 0.0284 ± 0.0002 | 0.073              |
|                    | 0.800 | 0.200 | 0.0129 ± 0.0007 | 4.73 ± 0.04 |      | 0.0139 ± 0.0007 | 0.158              |
| <i>Ala-Gly-Ala</i> | 0.700 | 0.300 | 0.0068 ± 0.0003 | 4.86 ± 0.05 |      | 0.0074 ± 0.0003 | 0.339              |
|                    | 1.000 | 0.000 | 0.4059 ± 0.0010 | 5.86 ± 0.02 | 5.84 | 0.4232 ± 0.0010 | <i>Monohydrate</i> |
|                    | 0.900 | 0.100 | 0.3563 ± 0.0013 | 5.91 ± 0.02 |      | 0.3822 ± 0.0013 |                    |
|                    | 0.800 | 0.200 | 0.2775 ± 0.0806 | 5.94 ± 0.01 |      | 0.2974 ± 0.0806 |                    |
| <i>Ala-Ala-Ala</i> | 0.700 | 0.300 | 0.2107 ± 0.0390 | 5.95 ± 0.01 |      | 0.2256 ± 0.0390 |                    |
|                    | 1.000 | 0.000 | 0.0946 ± 0.0040 | 5.51 ± 0.01 | 5.87 | 0.1002 ± 0.0040 | <i>Hemihydrate</i> |
|                    | 0.900 | 0.100 | 0.0947 ± 0.0019 | 5.15 ± 0.04 |      | 0.1017 ± 0.0019 |                    |
|                    | 0.800 | 0.200 | 0.0584 ± 0.0030 | 5.41 ± 0.04 |      | 0.0632 ± 0.0030 |                    |
| <i>Leu-Gly-Gly</i> | 0.700 | 0.300 | 0.0328 ± 0.0015 | 5.46 ± 0.04 |      | 0.0355 ± 0.0015 |                    |
|                    | 1.000 | 0.000 | 0.2812 ± 0.0030 | 5.42 ± 0.02 | 5.76 | 0.2940 ± 0.0030 | 0.004              |
|                    | 0.900 | 0.100 | 0.2470 ± 0.0127 | 5.51 ± 0.04 |      | 0.2632 ± 0.0127 | 0.004              |
|                    | 0.800 | 0.200 | 0.2181 ± 0.0037 | 5.55 ± 0.04 |      | 0.2325 ± 0.0030 | 0.005              |
| <i>Gly-Leu-Gly</i> | 0.700 | 0.300 | 0.1650 ± 0.0031 | 5.64 ± 0.04 |      | 0.1760 ± 0.0019 | 0.006              |
|                    | 1.000 | 0.000 | 0.0625 ± 0.0013 | 5.34 ± 0.01 | 5.81 | 0.0693 ± 0.0010 | 0.070              |
|                    | 0.900 | 0.100 | 0.0561 ± 0.0105 | 5.56 ± 0.09 |      | 0.0630 ± 0.0105 | 0.072              |
|                    | 0.800 | 0.200 | 0.0460 ± 0.0072 | 5.62 ± 0.06 |      | 0.0517 ± 0.0072 | 0.092              |
| <i>Gly-Gly-Leu</i> | 0.700 | 0.300 | 0.0252 ± 0.0044 | 5.73 ± 0.06 |      | 0.0283 ± 0.0044 | 0.136              |
|                    | 1.000 | 0.000 | 0.1676 ± 0.0040 | 5.71 ± 0.01 | 5.77 | 0.1866 ± 0.0040 | 0.186              |
|                    | 0.900 | 0.100 | 0.1176 ± 0.0016 | 5.75 ± 0.03 |      | 0.1325 ± 0.0016 | 0.231              |
|                    | 0.800 | 0.200 | 0.0798 ± 0.0021 | 5.87 ± 0.04 |      | 0.0899 ± 0.0021 | 0.366              |
| <i>Gly-Ala-Leu</i> | 0.720 | 0.280 | 0.0680 ± 0.0019 | 6.01 ± 0.04 |      | 0.0764 ± 0.0019 | 0.649              |
|                    | 1.000 | 0.000 | 0.0141 ± 0.0010 | 5.89 ± 0.01 | 5.81 | 0.0158 ± 0.0010 | 0.041              |
|                    | 1.000 | 0.000 | 0.0096 ± 0.0008 | 5.92 ± 0.02 |      | 0.0108 ± 0.0008 | 0.056              |
|                    | 0.900 | 0.100 | 0.0068 ± 0.0006 | 5.94 ± 0.02 |      | 0.0076 ± 0.0006 | 0.102              |
|                    | 0.800 | 0.200 | 0.0028 ± 0.0019 | 5.97 ± 0.01 |      | 0.0032 ± 0.0019 | 0.208              |

<sup>a</sup> For Met no experimental determined melting properties was possible to measure using FSC, <sup>b</sup> solubility data measured from previous work<sup>7</sup>, <sup>c</sup> solubility data measured from previous work<sup>8</sup>, <sup>d</sup> Bowden,2018<sup>9</sup>

## 8. Diffractograms

PXRD measurements of pure amino acids and the amino acids in solid phase equilibrated with saturated solution

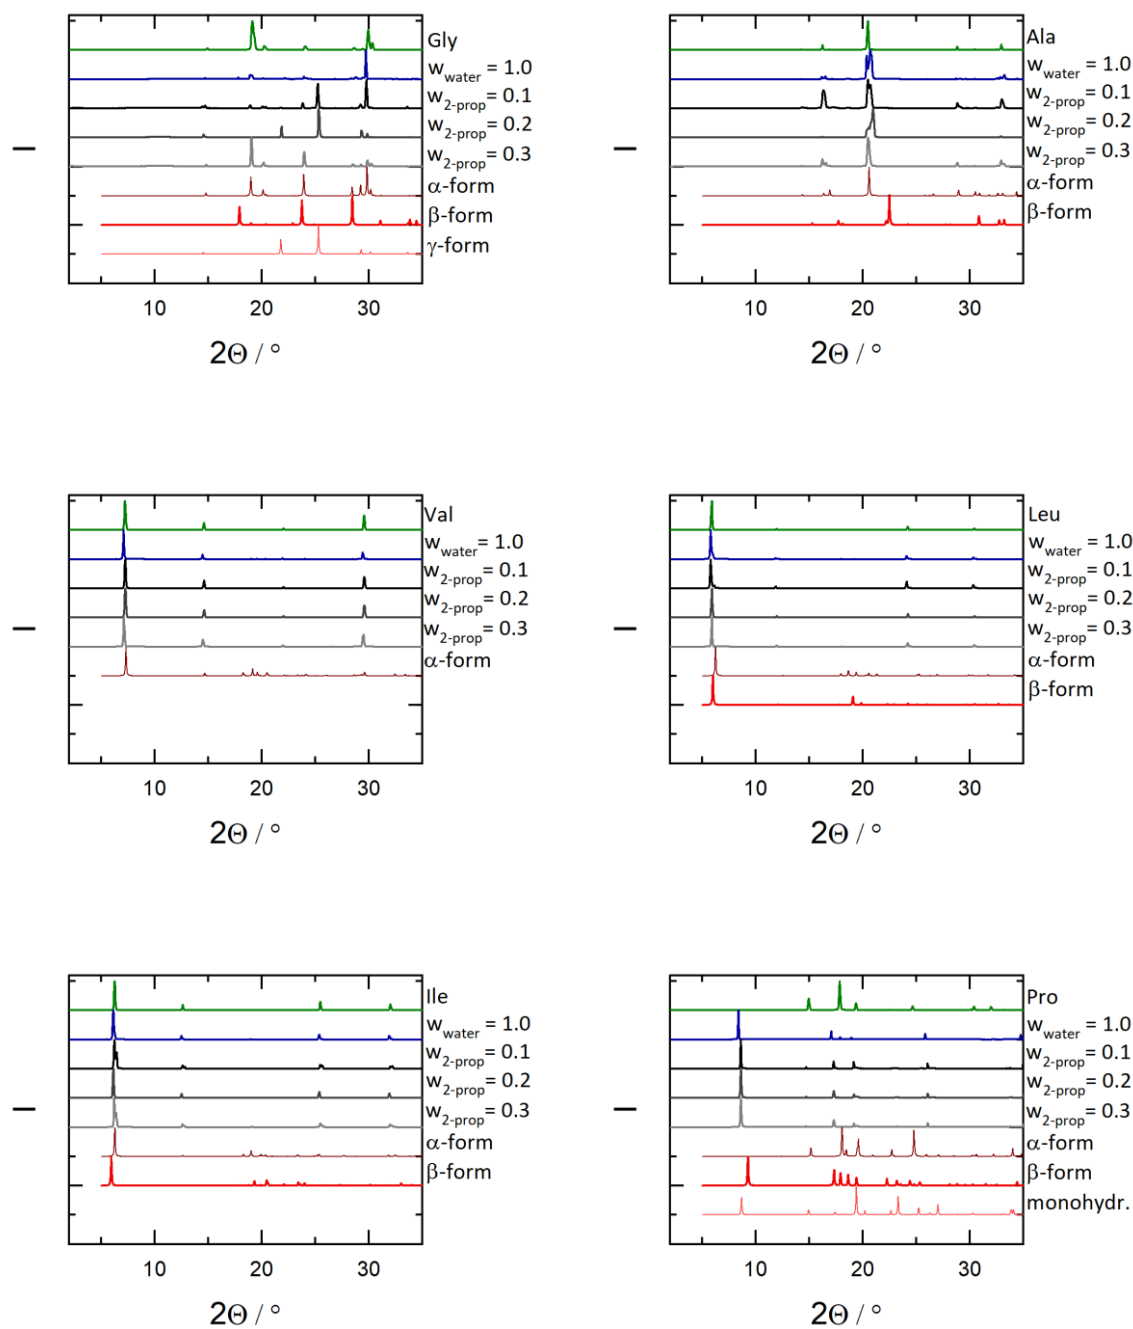

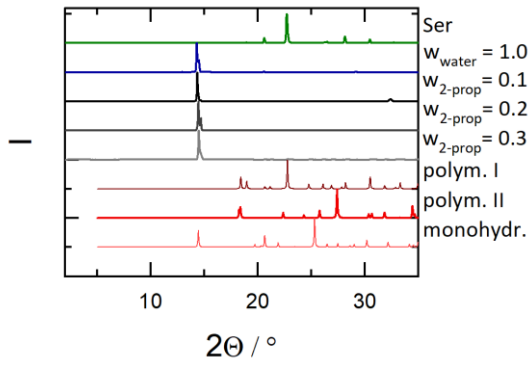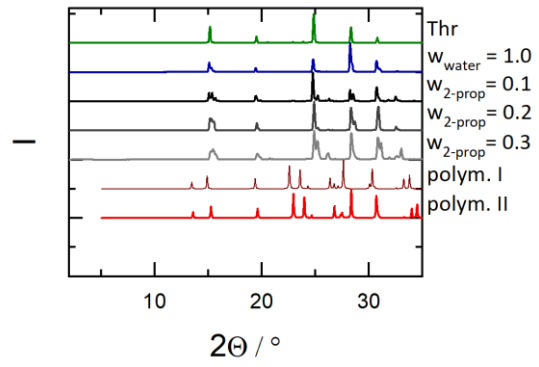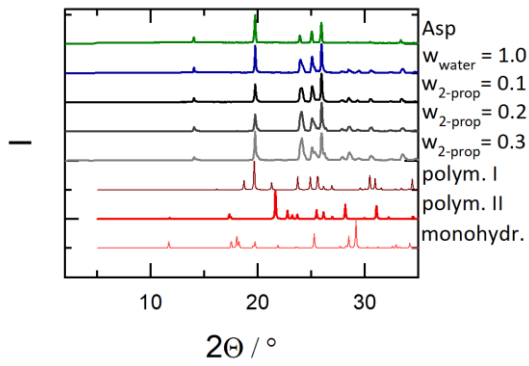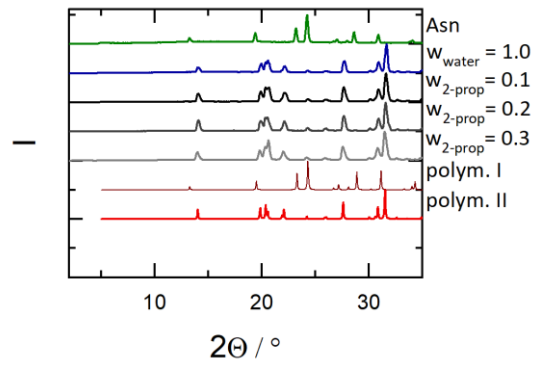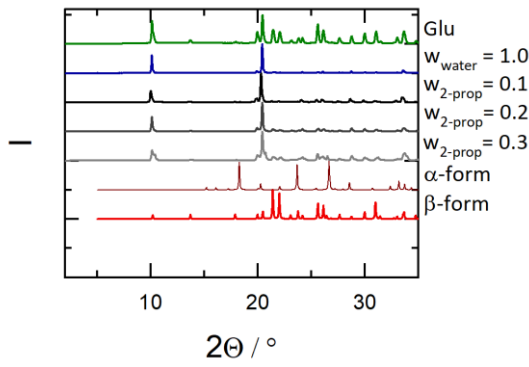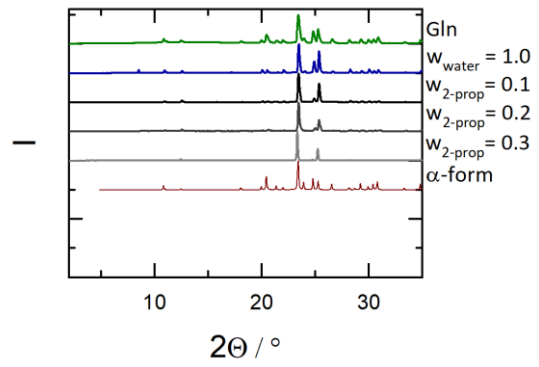

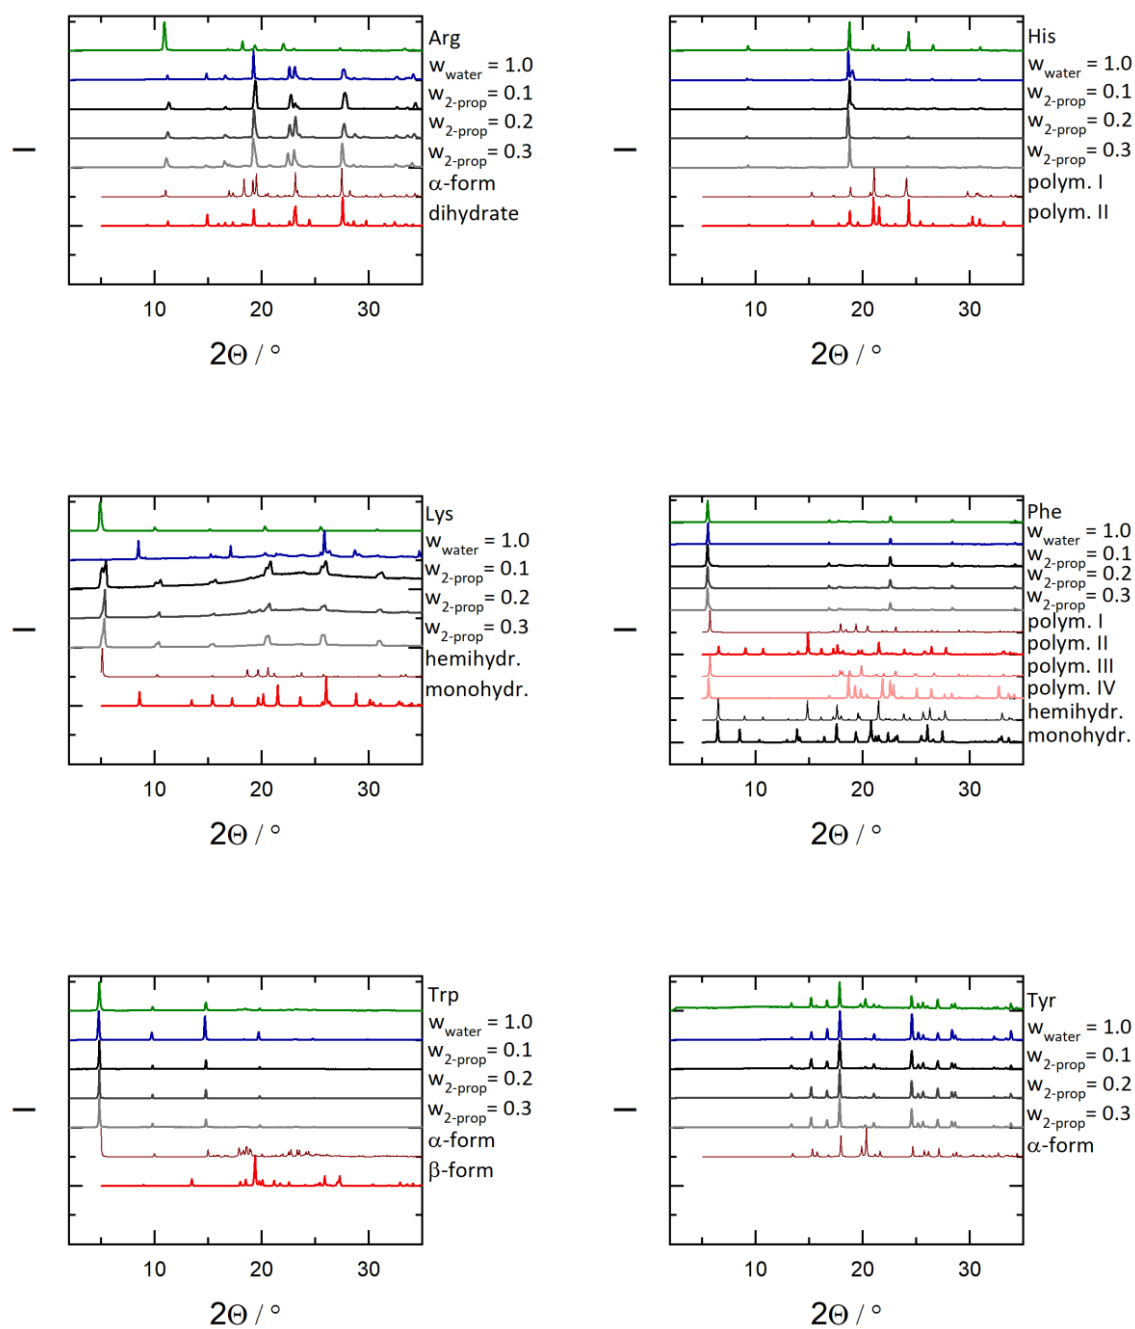

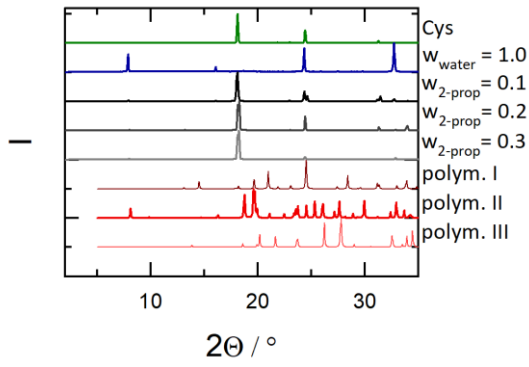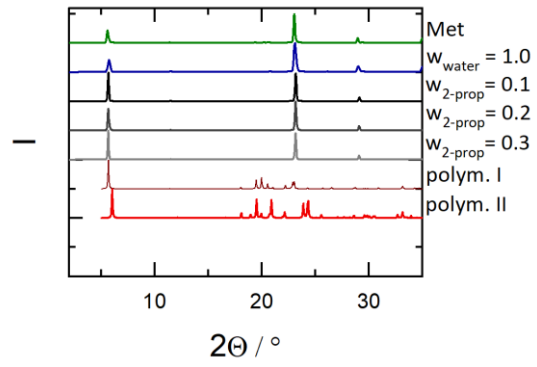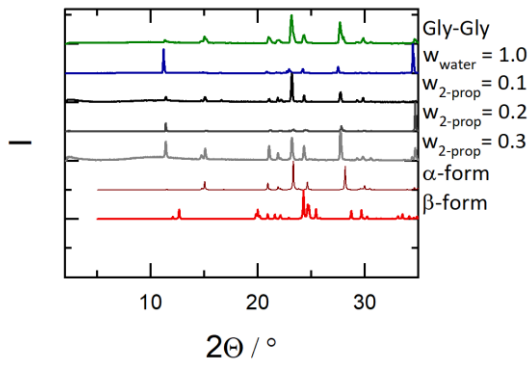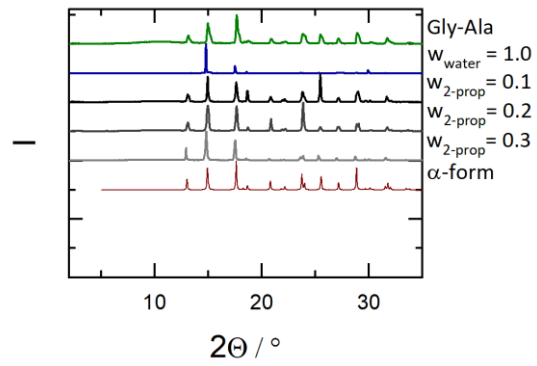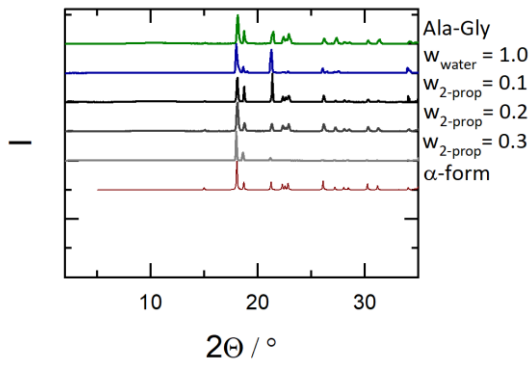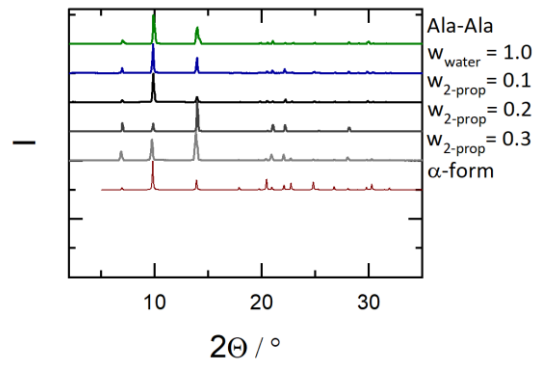

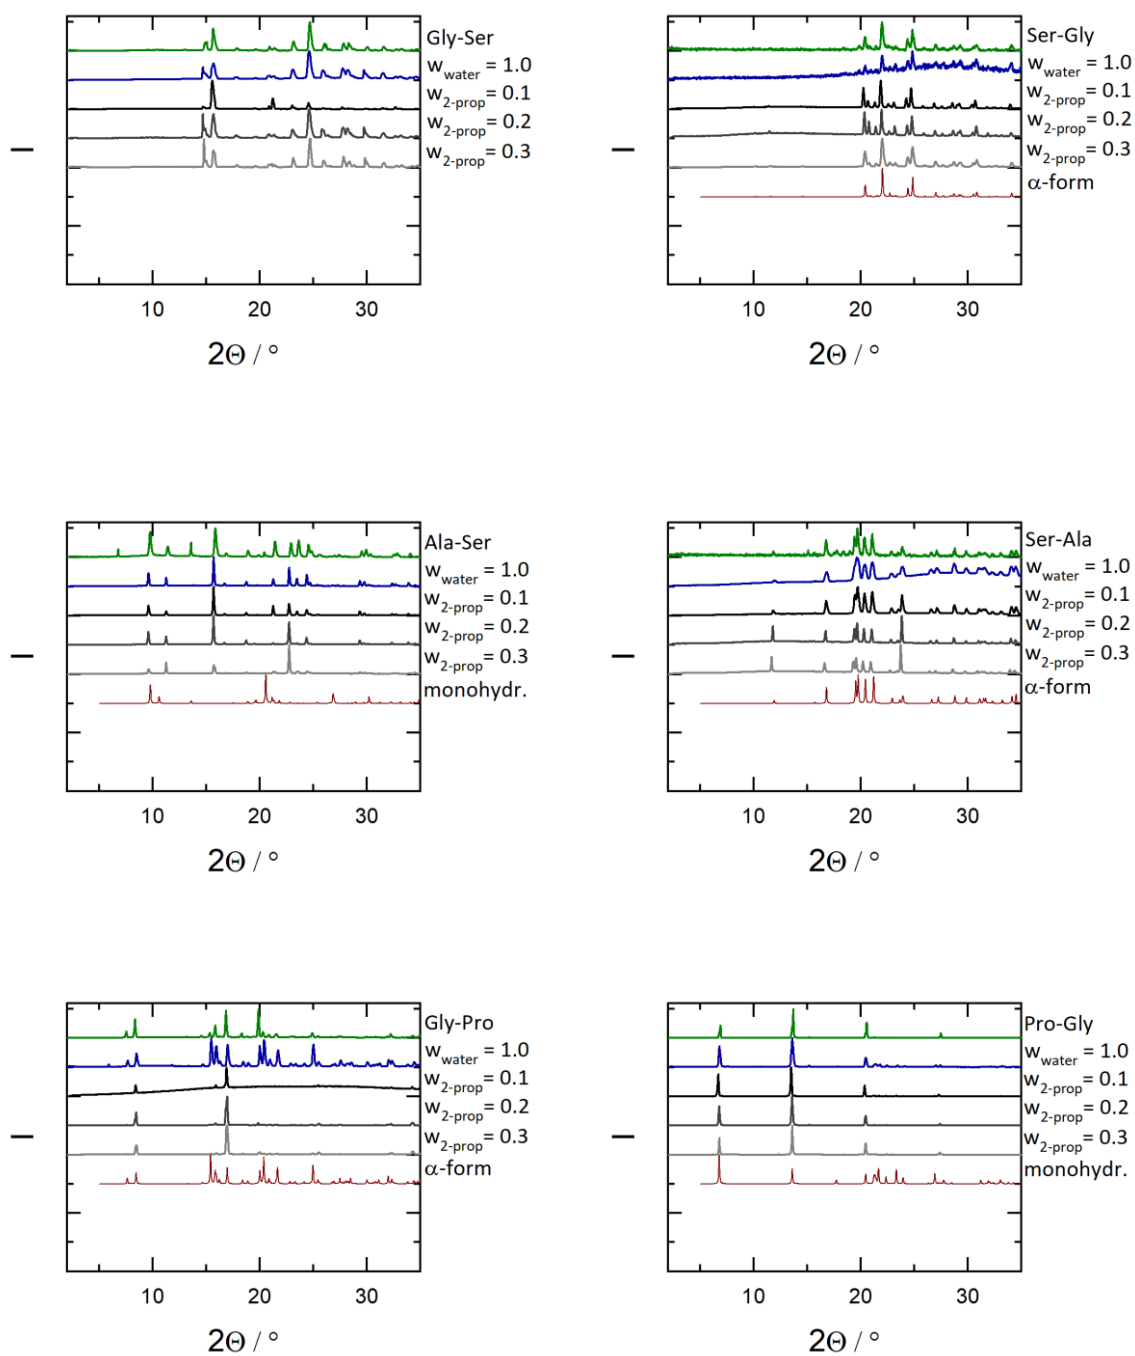

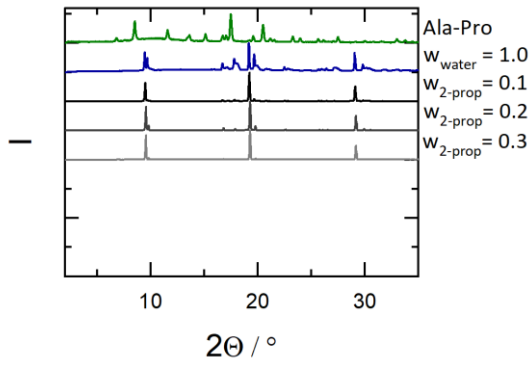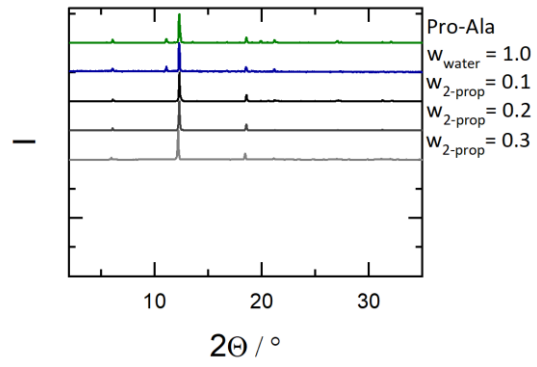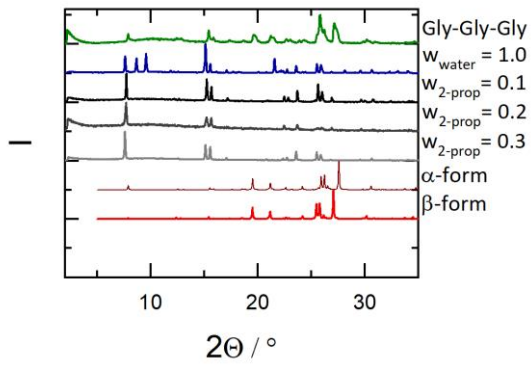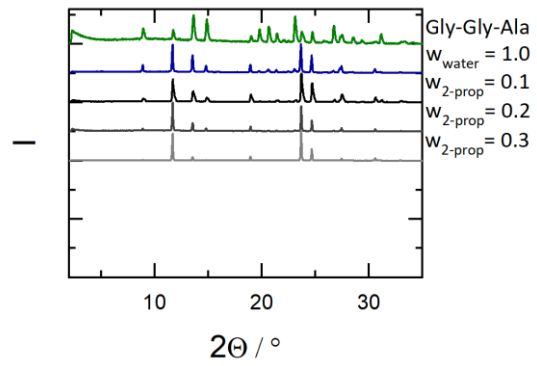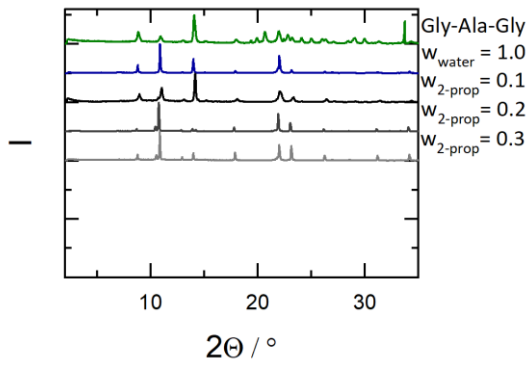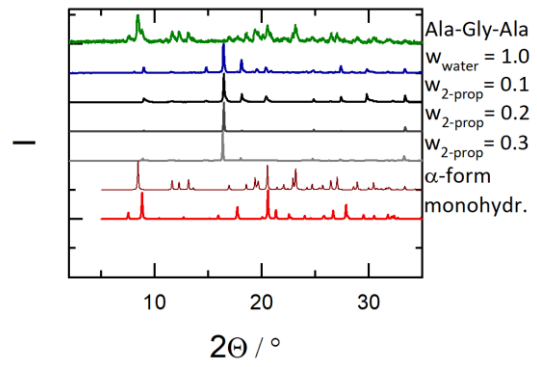



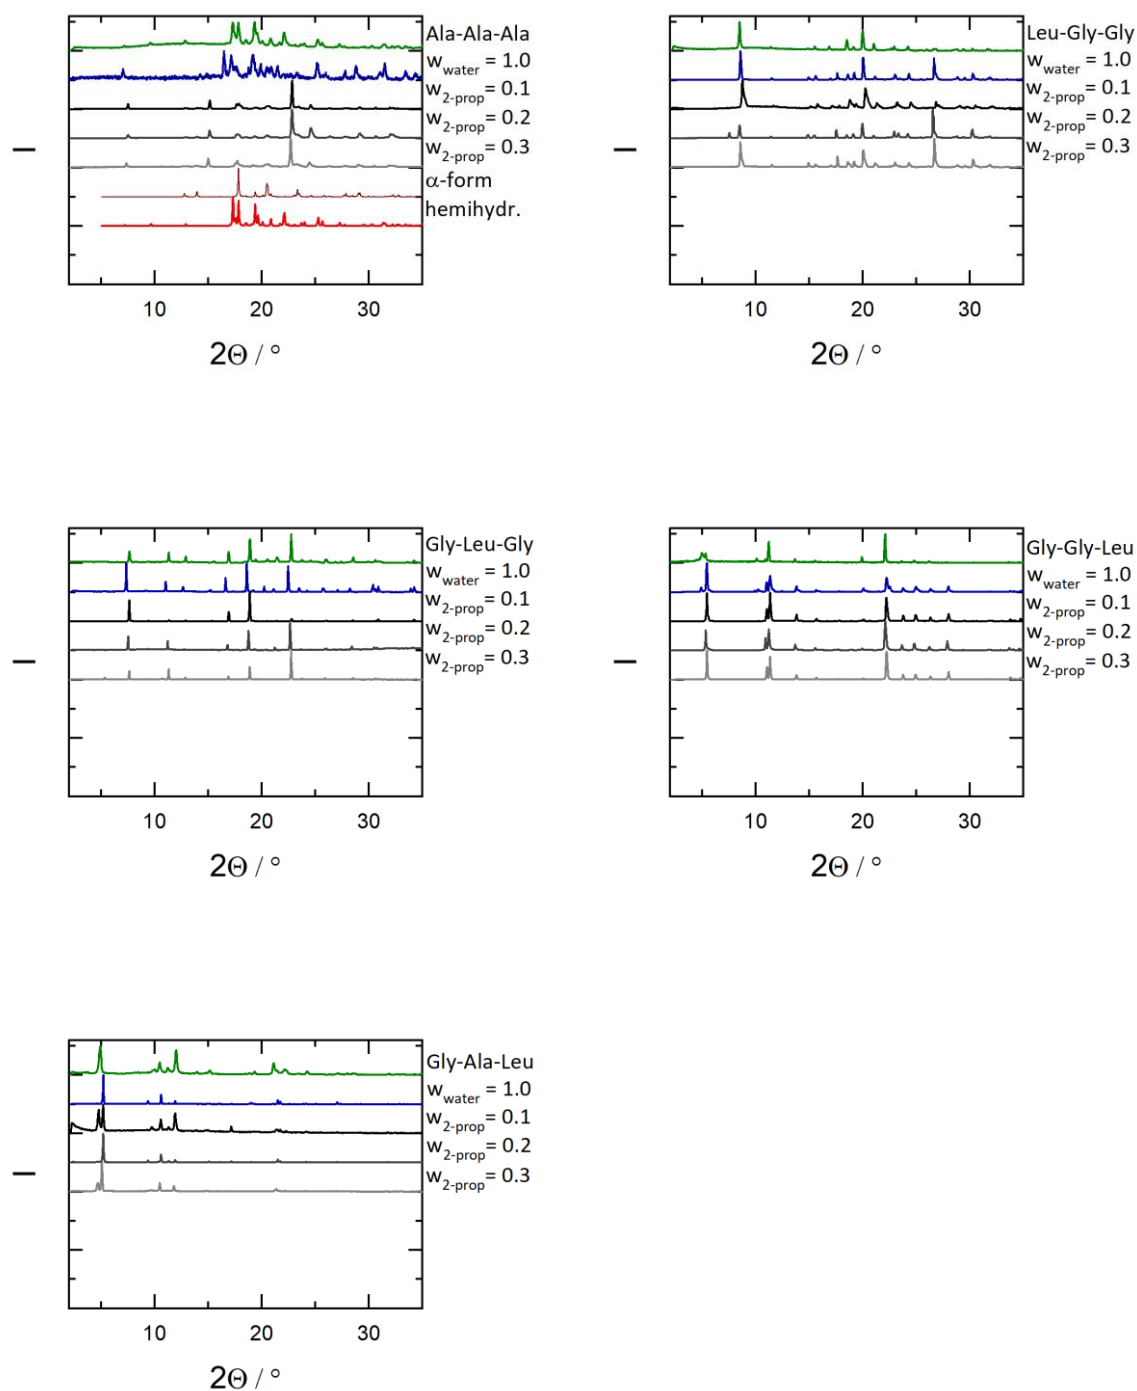

Figure S2: PXRD diffractograms of amino acids and peptides. Green line: pure component; blue line: solid phase of the supersaturated solution containing pure water; black line: solid phase of the supersaturated solution containing a 2-propanol fraction of 10 wt%; dark grey line: solid phase of the supersaturated solution containing a 2-propanol fraction of 20 wt%; light grey line: solid phase of the supersaturated solution containing a 2-propanol fraction of 30 wt%; red lines: diffractograms from Cambridge Crystallographic Data Centre (CCDC).

## 9. $g^E$ models vs. PC-SAFT

In the current work, the solubility of 15 proteinogenic amino acids and 18 peptides in water and in water+2-propanol was modeled using different  $g^E$  models (Wilson, NRTL, UNIQUAC) in comparison with PC-SAFT. As an example only the results for the amino acid Glu is shown:.

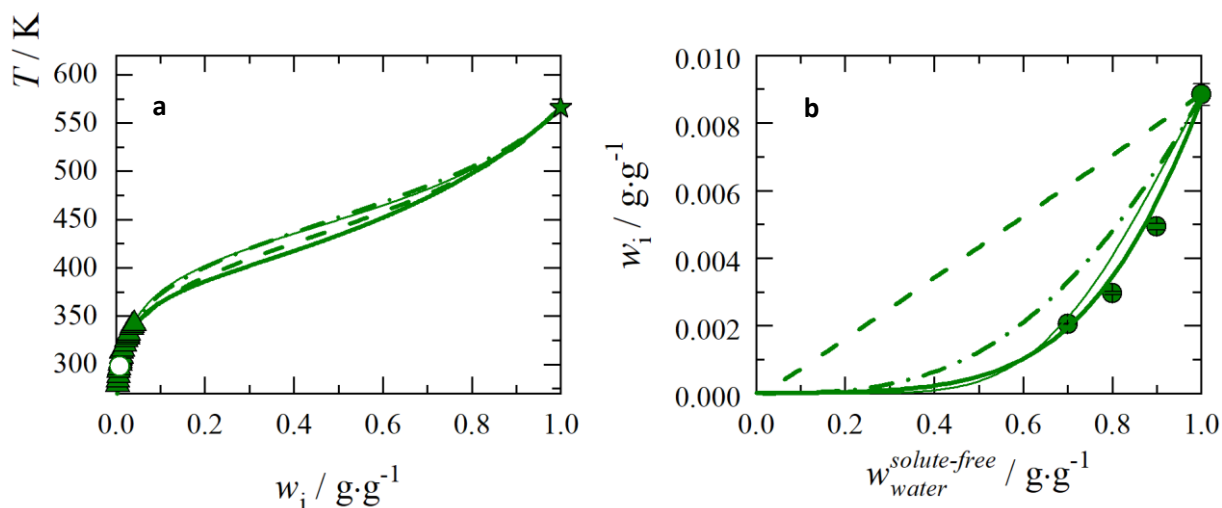

Figure S3: (a) The temperature-dependent solubilities of Glu at  $p = 1 \text{ atm}$ .  $\circ$ : represent the own solubility measurement, literature solubility data  $\blacktriangle$ : Matsuo<sup>10</sup> and  $\star$ : melting temperature of Glu. (b) The Glu solubility dependent on the 2-propanol weight fraction at  $T = 298.15 \text{ K}$  and  $p = 1 \text{ atm}$  in unbuffered solutions  $\text{pH} = \text{pI}$  in a pseudo-binary plot.  $\bullet$  represents the own solubility measurements. On the x-axis the solute-free weight fraction of water for aqueous 2-propanol solutions is shown. On the y-axis the solubility in the ternary system of the amino acid is shown. Lines are modeling results using PC-SAFT (thick solid lines), Wilson (dashed lines), NRTL (dashed-dotted lines), UNIQUAC (thin solid lines).

The binary parameters between component (1) and water (2) were fitted to aqueous solubility data shown in Figure S3 (a). The binary parameters between water (2) and 2-propanol (3) were separately fitted to vapor-liquid data and shown in Table S7. In a last step the binary parameters of component (1) and 2-propanol (3) were fitted to aqueous solubility data with 2-propanol contributions shown in Figure S3 (b).

**Table S7** Modeling parameters with Wilson, NRTL and UNIQUAC of binary and ternary systems with Glu as component (1) + water (2) + 2-propanol (3). For Wilson, NRTL and UNIQUAC the binary parameters were simultaneously fitted to the experimental determined activity coefficients. The ARD values including all the number of experimental points (NP) and the corresponding literature solubility data were determined for temperature-dependent solubility in binary mixtures (second column); for ternary systems ARD includes only data at  $T = 298.15\text{ K}$ , but the mass fraction of 2-propanol in water varies.

|         | Binary mixture component(1)+water(2) |                             |                   |       | Ternary mixture component(1)+water(2)+2-propanol(3) |                             |                             |                             |                  |        |
|---------|--------------------------------------|-----------------------------|-------------------|-------|-----------------------------------------------------|-----------------------------|-----------------------------|-----------------------------|------------------|--------|
|         | $\Delta\lambda_{12}$                 | $\Delta\lambda_{21}$        | NP/lit.           | ARD   | $\Delta\lambda_{13}$                                | $\Delta\lambda_{31}$        | $\Delta\lambda_{23}$        | $\Delta\lambda_{32}$        | NP/lit.          | ARD    |
| Wilson  | $//J \cdot \text{mol}^{-1}$          | $//J \cdot \text{mol}^{-1}$ |                   | / %   | $//J \cdot \text{mol}^{-1}$                         | $//J \cdot \text{mol}^{-1}$ | $//J \cdot \text{mol}^{-1}$ | $//J \cdot \text{mol}^{-1}$ |                  | / %    |
|         | -672.28                              | -1562.59                    | 23 <sup>/10</sup> | 12.73 | 25000.00                                            | 25000.00                    | 7567.00                     | 1265.58                     | 3 <sup>/11</sup> | 100.42 |
| NRTL    | $\Delta g_{12}$                      | $\Delta g_{21}$             | NP/lit.           | ARD   | $\Delta g_{13}$                                     | $\Delta g_{31}$             | $\Delta g_{23}$             | $\Delta g_{32}$             | NP/lit.          | ARD    |
|         | $//J \cdot \text{mol}^{-1}$          | $//J \cdot \text{mol}^{-1}$ |                   | / %   | $//J \cdot \text{mol}^{-1}$                         | $//J \cdot \text{mol}^{-1}$ | $//J \cdot \text{mol}^{-1}$ | $//J \cdot \text{mol}^{-1}$ |                  | / %    |
|         | -4914.93                             | 6075.15                     | 23 <sup>/10</sup> | 5.80  | 14969.02                                            | 14618.02                    | 8463.11                     | -344.29                     | 3 <sup>/11</sup> | 39.83  |
| UNIQUAC | $\Delta u_{12}$                      | $\Delta u_{21}$             | NP/lit.           | ARD   | $\Delta u_{13}$                                     | $\Delta u_{31}$             | $\Delta u_{23}$             | $\Delta u_{32}$             | NP/lit.          | ARD    |
|         | $//J \cdot \text{mol}^{-1}$          | $//J \cdot \text{mol}^{-1}$ |                   | / %   | $//J \cdot \text{mol}^{-1}$                         | $//J \cdot \text{mol}^{-1}$ | $//J \cdot \text{mol}^{-1}$ | $//J \cdot \text{mol}^{-1}$ |                  | / %    |
|         | -1432.46                             | 559.12                      | 23 <sup>/10</sup> | 8.59  | 20000.00                                            | 20000.00                    | 1145.06                     | 841.15                      | 3 <sup>/11</sup> | 23.51  |

For binary mixtures (component + water) the modeling performance of all  $g^E$  models as well as PC-SAFT are in good agreement with the experimental data of Glu. For ternary mixtures the modeling performances differ. The Wilson model shown qualitatively good results but not quantitatively. Additionally the fit of binary parameters between component (1) and 2-propanol (3) was set to a maximum value of 25000  $J \text{ mol}^{-1}$ . On the one hand higher values don't lead to significantly better results and on the other hand higher values would not be physically reasonable. The NRTL model shows better results compared to the Wilson model. Here the lowest ARD values could be determined but the modeling results are still not in a good agreement with the experimental solubility data. The UNIQUAC model shows also better results comparing to NRTL. But as applied already in the Wilson model, the binary parameters between component (1) and 2-propanol (3) was also set to a maximum value of 20000  $J \text{ mol}^{-1}$ .

Glu is only one example shown here. The overall mean ARD of all amino acids and peptides in binary and ternary mixtures are listed in Table S8.

**Table S8** Average relative deviation (ARD) between modeling results and experimental solubility of amino acids and peptides for  $g^E$  models (Wilson, NRTL, UNIQUAC) and PC-SAFT.

| Model   | Component(1)+water(2)  |                     | Component(1)+water(2)+2-propanol(3) |                     |
|---------|------------------------|---------------------|-------------------------------------|---------------------|
|         | Amino acids<br>ARD / % | Peptides<br>ARD / % | Amino acids<br>ARD / %              | Peptides<br>ARD / % |
| Wilson  | 19.71                  | 6.95                | 50.15                               | 118.42              |
| NRTL    | 18.61                  | 6.78                | 28.61                               | 56.30               |
| UNIQUAC | 15.00                  | 8.10                | 28.27                               | 33.74               |
| PC-SAFT | 5.63                   | 5.69                | 7.80                                | 7.31                |

The accuracy of the experimental uncertainty was determined to be about RMSD = 3%. It can be clearly seen that the PC-SAFT modeling shows a better modeling performance with less binary parameters ( $k_{13}$ ). To summarize, PC-SAFT is recommended for modeling solubility of biomolecules such as amino acids and peptides in broad temperature ranges and/or upon co-solvent addition. In contrast, among the  $g^E$  models only UNIQUAC allowed a reasonable modeling result while Wilson and NRTL is not recommended for modeling the systems under study. It would be interesting to prove or disprove this finding also for other systems in the future.

---

## 10. References

1. B. P. Dey, S. Dutta, S. C. Lahiri, *Indian Journal of Chemistry*, 1982(Vol. 21A), 886.
2. A. Avdeef, *Adv Drug Deliv Rev*, 2007, **59**(7), 568.
3. C. Held, L.F. Cameretti and G. Sadowski, *Ind. Eng. Chem. Res.*, 2011, **50**(1), 131.
4. Y.Z. Chua, H.T. Do, C. Schick, D. Zaitsau and C. Held, *RSC Adv.*, 2018, **8**(12), 6365.
5. J. Gross and G. Sadowski, *Ind. Eng. Chem. Res.*, 2001, **40**(4), 1244.
6. R.L. Lundblad and F.M. Macdonald, *Handbook of biochemistry and molecular biology*, CRC Press, Boca Raton, FL 33487-2742, 2010.
7. H.T. Do, Y.Z. Chua, Kumar A., D. Pabsch, M. Hallermann, D. Zaitsau, C. Schick and C. Held, *RSC Adv.*, 2020(10), 44205.
8. H.T. Do, Y.Z. Chua, J. Habicht, Klinski M., S. Volpert, D. Pabsch, M. Hallermann, M. Thome, D. Zaitsau, C. Schick and C. Held, *Ind. Eng. Chem. Res.*, 2021.
9. N.A. Bowden, J.P.M. Sanders and M.E. Bruins, *J Chem Eng Data*, 2018, **63**(3), 488.
10. H. Matsuo, Y. Suzuki and S. Sawamura, *Fluid Phase Equilibria*, 2002(200), 227.
11. H.T. Do, P. Franke, S. Volpert, M. Klinski and C. Held, *Phys. Chem. Chem. Phys. (in revision)*, 2021.
